# Supplementary material
Source: PubMed Central journal article supplement (PMC5817487)
Supplement: jama-318-731-s001.pdf [file jama-318-731-s001.pdf]

**PROTOCOL**

**A Randomized Double-Blind Placebo-Controlled Trial of Ganciclovir/Valganciclovir for  
Prevention of Cytomegalovirus Reactivation in Acute Injury of the Lung and Respiratory Failure**

**The GRAIL Study**

Clinical Trial Sponsored by the  
NHLBI  
Bethesda, Maryland, USA

Study Drugs Provided by  
Genentech, A member of the Roche Group

IND Exempt #108,748

**May 4, 2016**

Version 3.4.1

Version 3.4.1 eliminates the use of Valganciclovir, the oral study drug for subjects not already assigned oral study drug. References related to assignment to Valganciclovir have been excluded from the protocol as appropriate.

---

2

**ABBREVIATIONS**

|      |                                     |
|------|-------------------------------------|
| ALI  | Acute Lung Injury                   |
| ARDS | Acute Respiratory Distress Syndrome |
| CBC  | Complete Blood Count                |
| ETT  | Endotracheal Aspirate               |
| HSCT | Hematopoietic Stem Cell Transplant  |
| ICAM | Intercellular Adhesion Molecule     |
| ICU  | Intensive Care Unit                 |
| IL   | Interleukin                         |
| LOS  | Length of Stay                      |
| Plt  | Platelet                            |
| SOT  | Solid Organ Transplant              |
| TGF  | Tumor Growth Factor                 |
| TNF  | Tumor Necrosis Factor               |
| WBC  | White Blood Cell Count              |

3

4

5

6

7

**TABLE OF CONTENTS**

|    |          |                                                                                                                                       |           |
|----|----------|---------------------------------------------------------------------------------------------------------------------------------------|-----------|
| 8  | <b>1</b> | <b>PROTOCOL SUMMARY.....</b>                                                                                                          | <b>6</b>  |
| 9  | <b>2</b> | <b>BACKGROUND .....</b>                                                                                                               | <b>9</b>  |
| 10 | 2.1      | Critical illness due to severe sepsis and trauma                                                                                      | 9         |
| 11 | 2.2      | Acute Lung Injury (ALI)                                                                                                               | 9         |
| 12 | 2.3      | Cytomegalovirus reactivates frequently in patients with sepsis and acute lung injury and is associated with adverse clinical outcomes | 10        |
| 13 |          |                                                                                                                                       |           |
| 14 | 2.4      | CMV overview                                                                                                                          | 10        |
| 15 | <b>3</b> | <b>GANCICLOVIR .....</b>                                                                                                              | <b>14</b> |
| 16 | 3.1      | Mode of action                                                                                                                        | 14        |
| 17 | 3.2      | Clinical use                                                                                                                          | 14        |
| 18 | 3.3      | Forms of ganciclovir                                                                                                                  | 14        |
| 19 | 3.4      | Standard dosing regimens                                                                                                              | 15        |
| 20 | 3.5      | Safety profile                                                                                                                        | 15        |
| 21 | 3.6      | Potential toxicities of ganciclovir                                                                                                   | 15        |
| 22 | 3.7      | Other recent investigational applications of ganciclovir                                                                              | 18        |
| 23 | <b>4</b> | <b>RATIONALE.....</b>                                                                                                                 | <b>19</b> |
| 24 | 4.1      | Rationale for study intervention                                                                                                      | 19        |
| 25 | 4.2      | Rationale for study population                                                                                                        | 20        |
| 26 | 4.3      | Rationale for the choice of drug, dose & regimen                                                                                      | 21        |
| 27 | 4.4      | Rationale for choice of endpoints                                                                                                     | 21        |
| 28 | <b>5</b> | <b>STUDY HYPOTHESES, OBJECTIVES AND ENDPOINTS.....</b>                                                                                | <b>22</b> |
| 29 | 5.1      | Primary Hypotheses                                                                                                                    | 22        |
| 30 | 5.2      | Secondary Objectives                                                                                                                  | 22        |
| 31 | <b>6</b> | <b>STATISTICAL CONSIDERATIONS.....</b>                                                                                                | <b>25</b> |
| 32 | 6.1      | Power Calculations for primary hypotheses                                                                                             | 25        |
| 33 | 6.2      | Statistical Analyses for endpoints.                                                                                                   | 26        |
| 34 | 6.3      | Randomization scheme                                                                                                                  | 27        |
| 35 | 6.4      | Blinding                                                                                                                              | 27        |
| 36 | 6.5      | Planned analyses prior to end of study                                                                                                | 27        |
| 37 | <b>7</b> | <b>SELECTION AND WITHDRAWAL OF SUBJECTS.....</b>                                                                                      | <b>30</b> |
| 38 | 7.1      | Study population                                                                                                                      | 30        |
| 39 | 7.2      | Randomization                                                                                                                         | 30        |
| 40 | 7.3      | Inclusion criteria                                                                                                                    | 30        |
| 41 | 7.4      | Exclusion criteria                                                                                                                    | 31        |
| 42 | 7.5      | Subject withdrawal                                                                                                                    | 32        |
| 43 | <b>8</b> | <b>STUDY DRUG ACQUISITION, PREPARATION, &amp; ADMINISTRATION .....</b>                                                                | <b>34</b> |
| 44 | 8.1      | Study drug & placebo formulation                                                                                                      | 34        |
| 45 | 8.2      | Acquisition of study drugs & placebos                                                                                                 | 34        |
| 46 | 8.3      | Storage of study drugs & placebos                                                                                                     | 34        |

|    |           |                                                                      |           |
|----|-----------|----------------------------------------------------------------------|-----------|
| 47 | 8.4       | Administration of study drugs & placebos                             | 34        |
| 48 | 8.5       | Renal dysfunction and hemodialysis                                   | 34        |
| 49 | 8.6       | Pharmacy Records                                                     | 34        |
| 50 | <b>9</b>  | <b>CLINICAL PROCEDURES .....</b>                                     | <b>35</b> |
| 51 | 9.1       | Patient identification & recruitment                                 | 35        |
| 52 | 9.2       | Informed Consent                                                     | 35        |
| 53 | 9.3       | Screening procedures                                                 | 36        |
| 54 | 9.4       | Patient Registration                                                 | 36        |
| 55 | 9.5       | Randomization procedure                                              | 36        |
| 56 | 9.6       | First dose of study drug                                             | 36        |
| 57 | 9.7       | Intervention (Study drug administration)                             | 37        |
| 58 | 9.8       | Co-interventions                                                     | 37        |
| 59 | 9.9       | Specimen collection                                                  | 37        |
| 60 | 9.10      | Survey study                                                         | 37        |
| 61 | 9.11      | Post-Enrollment Procedures                                           | 38        |
| 62 | 9.12      | Monitoring of renal function                                         | 38        |
| 63 | 9.13      | Monitoring for and managing neutropenia                              | 38        |
| 64 | 9.14      | Pregnancy                                                            | 39        |
| 65 | 9.15      | Unblinding                                                           | 39        |
| 66 | <b>10</b> | <b>LABORATORY PROCEDURES.....</b>                                    | <b>40</b> |
| 67 | 10.1      | Laboratory procedures                                                | 40        |
| 68 | 10.2      | Future use of stored specimens                                       | 40        |
| 69 | 10.3      | Biohazard containment                                                | 40        |
| 70 | <b>11</b> | <b>ADVERSE EVENT REPORTING.....</b>                                  | <b>41</b> |
| 71 | 11.1      | Adverse Events                                                       | 41        |
| 72 | 11.2      | Serious Adverse Events                                               | 42        |
| 73 | 11.3      | Reporting Adverse Events                                             | 42        |
| 74 | 11.4      | Relationship to study drug                                           | 46        |
| 75 | 11.5      | Pregnancy                                                            | 47        |
| 76 | 11.6      | Breaking the blind                                                   | 47        |
| 77 | 11.7      | Stopping rules                                                       | 47        |
| 78 | <b>12</b> | <b>DATA MANAGEMENT CONSIDERATIONS .....</b>                          | <b>48</b> |
| 79 | 12.1      | Data Collection                                                      | 48        |
| 80 | 12.2      | Data Management                                                      | 48        |
| 81 | 12.3      | Quality Control and Quality Assurance                                | 48        |
| 82 | 12.4      | Study monitoring                                                     | 48        |
| 83 | <b>13</b> | <b>ETHICAL CONSIDERATIONS &amp; HUMAN SUBJECTS PROTECTIONS .....</b> | <b>49</b> |
| 84 | 13.1      | Ethical Review                                                       | 49        |
| 85 | 13.2      | Potential risks of study drugs and procedures                        | 49        |
| 86 | 13.3      | Risks of Endotracheal Aspirates.....                                 | 49        |
| 87 | 13.4      | Potential benefit of enrollment                                      | 50        |

---

|     |           |                                                                      |           |
|-----|-----------|----------------------------------------------------------------------|-----------|
| 88  | <b>14</b> | <b>PROTOCOL OVERSIGHT AND GOVERNANCE .....</b>                       | <b>50</b> |
| 89  | 14.1      | Principal investigator                                               | 50        |
| 90  | 14.2      | Protocol Leadership Team                                             | 50        |
| 91  | 14.3      | Safety review team                                                   | 50        |
| 92  | 14.4      | Data Safety and Monitoring Plan (Appendix F)                         | 50        |
| 93  | 14.5      | Data and Safety Monitoring Board                                     | 50        |
| 94  | 14.6      | Study termination                                                    | 51        |
| 95  | <b>15</b> | <b>REFERENCES.....</b>                                               | <b>52</b> |
| 96  | <b>16</b> | <b>INVESTIGATORS STATEMENT/PROTOCOL SIGNATURE PAGE.....</b>          | <b>56</b> |
| 97  |           | <b>APPENDIX A: TIME AND EVENTS SCHEDULE.....</b>                     | <b>58</b> |
| 98  |           | <b>APPENDIX B: NCI COMMON TOXICITY CRITERIA (CTC).....</b>           | <b>59</b> |
| 99  |           | <b>APPENDIX C: COMMONLY PRESCRIBED IMMUNOSUPPRESSIVE AGENTS.....</b> | <b>60</b> |
| 100 |           | <b>APPENDIX D: LUNG PROTECTIVE VENTILATION PROTOCOL</b>              |           |
| 101 |           | <b>RECOMMENDATIONS.....</b>                                          | <b>61</b> |
| 102 |           | <b>APPENDIX E: CONSERVATIVE FLUID MANAGEMENT .....</b>               | <b>64</b> |
| 103 |           | <b>APPENDIX F: DATA AND SAFETY MONITORING PLAN .....</b>             | <b>65</b> |
| 104 |           | <b>APPENDIX G: SEVERE SEPSIS CRITERIA .....</b>                      | <b>67</b> |
| 105 |           | <b>APPENDIX H: GANCICLOVER PACKAGE INSERT .....</b>                  | <b>68</b> |
| 106 |           | <b>APPENDIX I: VALGANCICLOVIR PACKAGE INSERT.....</b>                | <b>69</b> |
| 107 |           |                                                                      |           |

108 **1** **PROTOCOL SUMMARY**

|     |                        |                                                                                                                                                                                                                                                                                                                                                                                                                                                                                                                                                            |
|-----|------------------------|------------------------------------------------------------------------------------------------------------------------------------------------------------------------------------------------------------------------------------------------------------------------------------------------------------------------------------------------------------------------------------------------------------------------------------------------------------------------------------------------------------------------------------------------------------|
| 109 | <b>Title</b>           | A Randomized Double-Blind Placebo-Controlled Trial of Ganciclovir/Valganciclovir for Prevention of Cytomegalovirus Reactivation in Acute Injury of the Lung and Respiratory Failure (The GRAIL Study)                                                                                                                                                                                                                                                                                                                                                      |
|     | <b>Study drugs</b>     | <p><b>Ganciclovir sodium:</b> 2-amino-9-<math>\beta</math>-D-ribofuranosyl-9H-purin-6-one. Marketed as Cytovene and Cymevene.</p> <p><b>Placebo for ganciclovir:</b> [normal saline]</p> <p><b>[ONLY for subjects enrolled and assigned oral study drug prior to approval of protocol version 3.4]</b></p> <p><b>Valganciclovir hydrochloride:</b> 2-[(2-amino-6-oxo-6,9-dihydro-3H-purin-9-yl) methoxy]-3-hydroxypropyl (2S)-2-amino-3-methylbutanoate. Marketed as Valcyte.</p> <p><b>Placebo for valganciclovir:</b> [matching pink-colored tablet]</p> |
|     | <b>Patients</b>        | Non-immunocompromised, CMV seropositive adults hospitalized with respiratory failure associated with severe sepsis or trauma.                                                                                                                                                                                                                                                                                                                                                                                                                              |
|     | <b>Protocol Schema</b> |                                                                                                                                                                                                                                                                                                                                                                                                                                                                                                                                                            |

|       |     | Schedule of administration*       |                                                                      |
|-------|-----|-----------------------------------|----------------------------------------------------------------------|
|       |     | Day 1 through Day 5               | Day 6 through Day 28 or hospital discharge, whichever occurs earlier |
| Arm   | N   | <i>Twice daily</i>                | <i>Once daily</i>                                                    |
| 1     | 80  | Ganciclovir 5 mg/kg intravenously | Ganciclovir 5 mg/kg intravenously,                                   |
| 2     | 80  | Normal saline intravenously       | Normal saline intravenously,                                         |
| Total | 160 |                                   |                                                                      |

111

112 \* "Day" on this table refers to study day. Day 1 is the first day of study drug administration.

|                                        |                                                                                                                                                                                                                                                                                                                                                                                                                                                                                                          |
|----------------------------------------|----------------------------------------------------------------------------------------------------------------------------------------------------------------------------------------------------------------------------------------------------------------------------------------------------------------------------------------------------------------------------------------------------------------------------------------------------------------------------------------------------------|
| <b>Primary Objective</b>               | To evaluate whether administration of ganciclovir reduces plasma IL-6 levels (i.e. reduction between baseline and 14 days post-randomization) in immunocompetent adults with severe sepsis or trauma associated respiratory failure.                                                                                                                                                                                                                                                                     |
| <b>Primary hypotheses</b>              | <p>In CMV seropositive adults with severe sepsis or trauma, pulmonary and systemic CMV reactivation amplifies and perpetuates both lung and systemic inflammation mediated through specific cytokines, and contributes to pulmonary injury and multiorgan system failure,</p> <p><b><u>AND</u></b></p> <p>Prevention of CMV reactivation with ganciclovir decreases pulmonary and systemic inflammatory cytokines that are important in the pathogenesis of sepsis and trauma related complications.</p> |
| <b>Study Design</b>                    | Multicenter randomized placebo-controlled double-blind trial, [randomized in blocks for balance across study sites and genders, with interim analyses of safety].                                                                                                                                                                                                                                                                                                                                        |
| <b>Study Duration</b>                  | 6 months per patient                                                                                                                                                                                                                                                                                                                                                                                                                                                                                     |
| <b>Trial Safety Monitoring</b>         | <p>Safety Review Team (see Section 14.3)</p> <p>Data Safety Monitoring Board (see Section 14.5)</p>                                                                                                                                                                                                                                                                                                                                                                                                      |
| <b>Study drug provider</b>             | Genentech, A member of the Roche Group                                                                                                                                                                                                                                                                                                                                                                                                                                                                   |
| <b>Sponsoring Agency</b>               | U.S. National Institutes of Health (NIH) National Heart, Lung, & Blood Institute (NHLBI)                                                                                                                                                                                                                                                                                                                                                                                                                 |
| <b>Coordinating Center</b>             | Fred Hutchinson Cancer Research Center/Vaccine & Infectious Disease Division (VIDD)                                                                                                                                                                                                                                                                                                                                                                                                                      |
| <b>Statistical and Data Management</b> | Fred Hutchinson Cancer Research Center/Vaccine & Infectious Disease Division (VIDD), Statistical Center for HIV/AIDS Research & Prevention (SCHARP)                                                                                                                                                                                                                                                                                                                                                      |
| <b>Endpoint Laboratory(ies)</b>        | FHCRC/University of Washington                                                                                                                                                                                                                                                                                                                                                                                                                                                                           |
| <b>Protocol Leadership Team</b>        | <p>Michael Boeckh, MD, Vaccine and Infectious Disease Division, Fred Hutchinson Cancer Research Center, Seattle, WA</p> <p>Ajit Limaye, MD, Dept. of Laboratory Medicine, Univ. of Washington, Seattle, WA</p> <p>Gordon Rubinfeld, MD, MSc Sunnybrook Medical Centre, Univ. of Toronto, Toronto, Canada</p>                                                                                                                                                                                             |

**Protocol Writing committee**

Ajit Limaye, MD

Michael Boeckh, MD

Gordon Rubinfeld, MD, MSc.

Renee Stapleton, MD, MSc.

Statisticians:

Ying Q. Chen, Ph.D., Member, Fred Hutchinson Cancer Research  
Center

NIH Medical Officer:

Andrea Harabin, PhD



## 114 2 BACKGROUND

### 115 2.1 Critical illness due to severe sepsis and trauma

116 Critical illness due to severe sepsis and trauma are major causes of morbidity and mortality, and a  
117 substantial economic burden in the United States and worldwide. Despite advances in clinical  
118 care, patients with sepsis and trauma-associated respiratory failure represent specific populations  
119 with high rates of adverse outcomes. The etiology of respiratory failure in patients with severe  
120 sepsis and trauma is multifactorial, but acute lung injury (ALI) is one of the leading causes, and is  
121 associated with prolonged ICU and hospital stays, mortality, and long-term sequelae. Other than  
122 general supportive care, few specific interventions other than lung protective ventilation have  
123 been shown to improve outcomes in such patients. New approaches for understanding the  
124 pathogenesis and developing better therapies are urgently needed.

125

### 126 2.2 Acute Lung Injury (ALI)

127 Acute Lung Injury (ALI) is a syndrome consisting of acute hypoxemic respiratory failure with  
128 bilateral pulmonary infiltrates that is associated with both pulmonary and nonpulmonary risk  
129 factors (e.g. sepsis, trauma) and that is not due primarily to left atrial hypertension [1]. Although a  
130 distinction between ALI and a more severe subtype (termed acute respiratory distress syndrome  
131 (ARDS) has been made, the pathogenesis, risk factors, and outcomes appear to be similar [1] and  
132 for the purposes of this protocol, the term acute lung injury [ALI] will be used to encompass both  
133 entities. Accepted consensus definitions of ALI have been introduced and are now widely used  
134 for laboratory and clinical investigations of ALI [2]. Acute Lung Injury (ALI) is defined as:

- 135 •  $\text{PaO}_2/\text{FiO}_2 < 300$
- 136 • Bilateral pulmonary infiltrates on chest x-ray
- 137 • Pulmonary Capillary Wedge Pressure  $< 18\text{mmHg}$  or no clinical evidence of increased left  
138 atrial pressure

139 Although a broad range of risk factors for ALI have been described, those that account for the  
140 majority of cases include: sepsis, pneumonia, trauma, and aspiration [1, 3]. It is well established  
141 that severe trauma is recognized as a precipitating cause of ALI [3]. Recent studies have  
142 demonstrated that the incidence of acute lung injury (ALI) is much higher than previously  
143 thought, with an estimated age-adjusted incidence of 86 per 100,000 persons per year, resulting in  
144 an estimated ~190,000 cases annually in the US [1]. The clinical and health care system impact of  
145 ALI is substantial, with an estimated 2,154,000 intensive care unit (ICU) days, 3,622,000 hospital  
146 days, and 75,000 deaths in 2000 [1], and is expected to grow significantly given the marked age-  
147 related incidence and the ageing population. Although general improvements in ICU care over the  
148 last 2 decades have led to a trend towards lower mortality due to certain ALI-associated risk  
149 factors (trauma, aspiration), the most common causes of ALI, sepsis and pneumonia, remain  
150 associated with high mortality rates of ~25-35% [4, 5]. Mortality in ALI is most commonly due to  
151 secondary infections/sepsis and multiorgan system failure rather than primary respiratory failure  
152 due to hypoxemia, highlighting the systemic nature of ALI [4, 6]. Even among initial survivors of  
153 ALI, substantial pulmonary and nonpulmonary functional impairment remains for months to  
154 years [7, 8]. Specifically, a proportion of those who survive the initial insult are at risk for  
155 prolonged mechanical ventilation and ICU/hospital stay, and the risk factors remain poorly  
156 defined. It has been hypothesized that a “2<sup>nd</sup> hit” may predispose certain patients to greater  
157 morbidity in this setting. Despite intensive basic and clinical investigation, only a single  
158 intervention (low-tidal volume [“lung protective”] ventilation) is generally accepted to decrease  
159 mortality in ALI [9], while multiple other strategies have failed to improve survival either in early

160 clinical studies or definitive efficacy trials. Thus, given the high incidence and continued  
161 substantial clinical impact of ALI despite improvements in general medical/ICU care, and limited  
162 proven options other than lung-protective ventilation, new approaches to understanding the  
163 pathophysiology and identifying novel targets for intervention in ALI are a high priority.

164 Overly intense, persistent and dysregulated pulmonary and systemic inflammation has emerged as  
165 the leading hypothesis for the pathogenesis of ALI and its complications, but the contributory  
166 factors and mechanisms are incompletely defined [10]. Several carefully-conducted prospective  
167 human studies have shown an association between specific inflammatory biomarkers in blood and  
168 BALF (both the initial levels at onset and changes over time) and important clinical outcomes in  
169 ALI [reviewed in [11, 12]. Animal models have also demonstrated an association between  
170 inflammatory cytokines and non-pulmonary organ injury and dysfunction [13, 14] In addition,  
171 one of the most important interventions (low-tidal volume [“lung protective”] ventilation) shown  
172 to decrease mortality in ALI is associated with reductions in inflammatory cytokines (IL-6, IL-8)  
173 in blood and bronchoalveolar lavage fluid [BALF] [9, 15, 16].

### 174 **2.3 Cytomegalovirus reactivates frequently in adult patients with critical illness and is** 175 **associated with adverse clinical outcomes**

176 Cytomegalovirus (CMV) is a ubiquitous virus in humans worldwide, and has been linked to  
177 adverse clinical outcomes including prolongation of mechanical ventilation, increased length of  
178 stay, and mortality in multiple studies of critically-ill, apparently immunocompetent, seropositive  
179 adults.

### 180 **2.4 CMV overview**

181 Cytomegalovirus (CMV) is a human herpesvirus known to infect more than 50-90% of US adults  
182 and is known to be a major cause of morbidity and mortality in immunocompromised patients.  
183 CMV infection can be acquired through multiple means, including: mother-to-child (in utero,  
184 breast milk), infected body fluids (saliva, genital secretions), blood transfusion or organ  
185 transplant. The prevalence of CMV infection increases with age throughout life such that by age  
186 90, ~90% of persons will have acquired CMV infection [17]. In immunocompetent persons,  
187 following primary infection by any of the routes noted above, CMV is controlled by the immune  
188 system and establishes latency (“dormancy”) in multiple organs/cell-types for the life of the host.  
189 In particular, the lung represents one of the largest reservoirs of latent CMV in seropositive hosts,  
190 and may explain the propensity for CMV-associated pulmonary disease in predisposed hosts [18].  
191 During periods of immunosuppression (or as a result of specific stimuli such as TNF- $\alpha$ , LPS, or  
192 catecholamines that are commonly associated with critical illness & sepsis [19], CMV can  
193 reactivate from latency (preferentially in the lung) to produce active infection (viral replication).  
194 In persons with impaired cellular immunity, reactivation can progress to high-grade CMV  
195 replication and commonly leads to tissue injury and clinically-evident disease such as CMV  
196 pneumonia. Lower-grade CMV reactivation that is otherwise clinically silent (“subclinical”) can  
197 also be detected in apparently immunocompetent persons with critical illness using sensitive  
198 techniques such as PCR [20]. In addition, even low-level, otherwise asymptomatic subclinical  
199 CMV reactivation can produce significant biologic effects both in vitro and in vivo, such as  
200 inflammation, fibrosis and immunosuppression. Each of these biologic effects of subclinical  
201 CMV infection has either previously been demonstrated (inflammation, fibrosis) or could  
202 theoretically be important (immunosuppression) in sepsis-associated ALI and its complications.  
203 These biological effects of CMV have been shown to occur through various mediators and other  
204 indirect means [reviewed in [21]. Importantly, several important CMV-associated adverse clinical  
205 outcomes in transplant populations [allograft rejection, secondary infections] are not necessarily  
206 accompanied by overt CMV disease and can only be detected by relatively sensitive means of  
207 virus detection such as PCR [22-24].

### 2.4.1 CMV reactivation in non-immunocompromised ICU patients

Reactivation of CMV in apparently immune competent patients with critical illness due to a broad range of causes has been documented in multiple prior studies using a variety of virologic techniques, as summarized in Table 1 [25]. The specific triggers for CMV reactivation from latency have been identified [19, 26] and are known to be elevated in patients with sepsis and acute lung injury [reviewed in [12, 27]. A prospective study in intubated patients with sepsis from Germany reported more than 60% rate of CMV DNA detection in tracheal aspirates [28].

215

Table 2-1: CMV reactivation in the ICU setting.

217

218

219

220

221

222

223

224

225

226

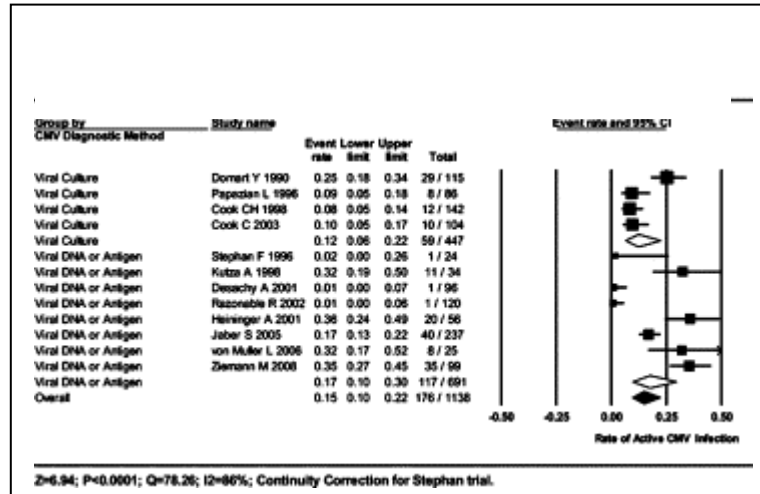

227

228

In addition to CMV reactivation in sepsis, CMV reactivation has also been demonstrated specifically in lung and blood of patients with acute lung injury.

Retrospectively testing samples collected in a prospective observational cohort study of patients at risk of developing ARDS, CMV reactivation (i.e. CMV DNA by PCR) was detected in BALF and/or plasma of 2/5 [40%] of subjects who developed ARDS, in sequential samples from 7/20 [35%] patients with ARDS, but not in patients at risk but who did not develop ARDS (0/5) [Limaye 2009 unpublished data]. In a separate study, CMV reactivation was retrospectively assessed by PCR in BALF of 88 subjects enrolled in a randomized trial of fish oil for treatment of ALI [29]. Seropositivity at baseline (i.e. evidence of latent CMV infection) in the cohort was 65% (similar to prior age-related estimates), and CMV reactivation (i.e. CMV DNA by PCR) was detected in BALF of 12/57 [21%] patients [Limaye unpublished data 2009].

### 2.4.2 CMV reactivation in non-immunocompromised adults is associated with adverse clinical outcomes.

Several lines of evidence have linked CMV reactivation with adverse clinical outcomes in non-immunosuppressed adults with critical illness. In a recent meta-analysis, CMV reactivation (compared to no reactivation) was associated with a 2-fold increased odds of mortality in ICU patients (Table 2) [25].

Table 2-2: Metaanalysis of mortality of in patients with CMV reactivation.

247  
248  
249  
250  
251  
252  
253  
254  
255  
256  
257  
258  
259  
260  
261  
262  
263  
264  
265  
266  
267  
268  
269  
270  
271  
272  
273  
274  
275  
276  
277  
278  
279  
280  
281  
282  
283  
284  
285  
286  
287  
288

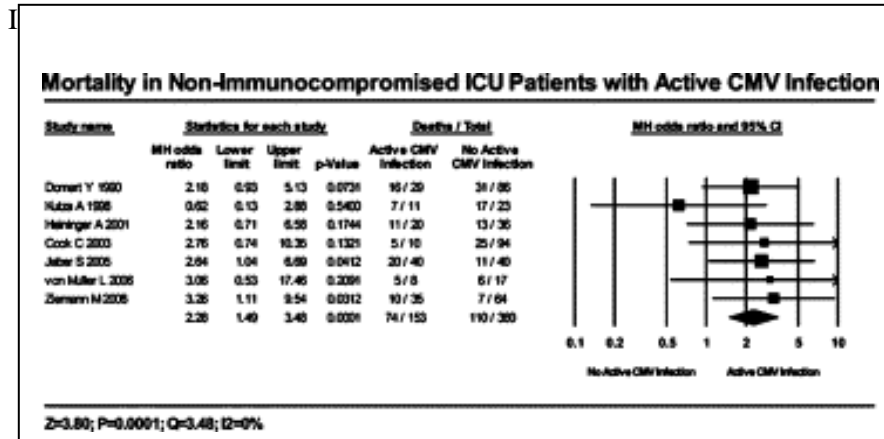

In addition to mortality, recent studies have demonstrated a strong and independent association between CMV reactivation and increased hospital and ICU length of stay [20] and duration of mechanical ventilation [30].

### *Mechanisms linking CMV reactivation with inflammation and lung injury.*

Several of the key inflammatory cytokines hypothesized to be important in the pathogenesis of ALI [12] have been directly linked to CMV infection. Specifically, CMV infection of various human cell types leads to increased production of IL-6 and IL-8 in vitro [31-35]. Elevated levels of these cytokines are found in blood [36, 37] and in the lung [38, 39] of humans with CMV reactivation (as measured by CMV DNA PCR). In an animal model of latently CMV infected mice, sepsis induced by cecal ligation and puncture leads to CMV reactivation and upregulation of proinflammatory cytokines in the lung and resulting lung injury (fibrosis) [19, 40, 41]. Furthermore, in this model, cytokine upregulation and lung injury all are reduced by administration of an antiviral agent (ganciclovir) that prevents CMV reactivation [41].

Thus, these data suggest that CMV reactivation could provide a mechanistic link between ALI and persistent dysregulated inflammation, and provides a novel target for intervention to reduce the morbidity and mortality of sepsis-associated ALI and its complications in adults

The hypothesized causal pathway is as follows: sepsis or pneumonia lead to ALI mediated through a cytokine 'storm'. The cytokines and other systemic mediators that are upregulated both within the lung and systemically in ALI are known potent stimuli for reactivation of CMV from latency. The resulting CMV reactivation within the lung and systemically then upregulates inflammatory and pro-fibrotic cytokines, thereby amplifying pulmonary and systemic inflammation and lung fibrosis, and ultimately leading to further lung injury, multiple organ dysfunction, prolonged length of stay, and late deaths. Progressively higher levels of CMV reactivation might also lead directly to tissue injury (i.e. CMV pneumonia) through direct CMV lytic effects as has recently been described [42]. And finally, CMV might also produce immunosuppressive effects (as seen in the transplant setting [21] which may predispose to nosocomial bacterial and fungal infections, (Figure 1).

**Figure 2-3: Hypothesis: Effects of CMV on the cascade of virus-induced magnification of inflammatory cytokine-mediated lung damage (solid lines) and other possible effects (dotted lines).**

289

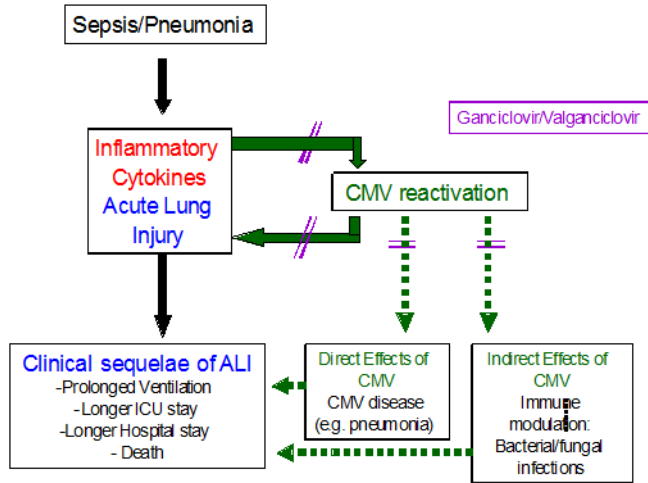

290

291

292

293

294

**295 3 GANCICLOVIR**

296 Ganciclovir [DHPG] is an FDA-approved antiviral agent with potent in vitro and in vivo activity  
297 against human cytomegalovirus and has been in widespread use in the United States and  
298 worldwide since it was approved in ~1988. More detailed information is contained within the  
299 package insert.

**300 3.1 Mode of action**

301 The primary mechanism of action is inhibition of viral DNA polymerase in virally-infected cells.  
302 More detailed information is contained within the package insert.

**303 3.2 Clinical use**

304 Ganciclovir is indicated for:

- 305 ○ Sight-threatening CMV retinitis in severely immunocompromised people
- 306 ○ CMV pneumonitis in bone marrow transplant recipients
- 307 ○ Prevention of CMV disease in bone marrow and solid organ transplant recipients
- 308 ○ Confirmed CMV retinitis in people with AIDS (intravitreal implant)

309 It is also used for acute CMV colitis in HIV/AIDS and CMV pneumonitis in immunosuppressed  
310 patients. See the package insert for more information.

**311 3.3 Forms of ganciclovir**

312 Ganciclovir is available in both intravenous (ganciclovir) and oral formulations (valganciclovir)  
313 and is proven efficacious for both prevention and treatment of CMV infection and disease in  
314 immunocompromised patients (transplant, HIV) and in neonates with congenital CMV infection  
315 [43, 44].

**316 3.3.1 Ganciclovir (intravenous formulation)**

317 Ganciclovir is an FDA-approved, commercially-available antiviral medication used to treat or  
318 prevent cytomegalovirus (CMV) infections. Ganciclovir sodium is marketed under the trade  
319 names Cytovene and Cymevene (Genentech, A member of the Roche Group).

320 Ganciclovir is a synthetic analogue of 2'-deoxy-guanosine. It is first phosphorylated to a  
321 deoxyguanosine triphosphate (dGTP) analogue. This competitively inhibits the incorporation of  
322 dGTP by viral DNA polymerase, resulting in the termination of elongation of viral DNA. See the  
323 package insert for more information.

**324 3.3.2 Valganciclovir (oral formulation)****325 NOTE: FOR SUBJECTS ENROLLED AND ASSIGNED ORAL STUDY DRUG PRIOR TO**  
**326 APPROVAL OF PROTOCOL VERSION 3.4**

327 An FDA-approved, commercially-available oral formulation of ganciclovir (a prodrug with good  
328 oral bioavailability [valganciclovir]) is also available. Valganciclovir hydrochloride (Valcyte,  
329 manufactured by Genentech, A member of the Roche Group), like intravenous ganciclovir, is  
330 approved for treatment and prevention of cytomegalovirus infections. As the L-valyl ester of  
331 ganciclovir, it is a prodrug of ganciclovir. After oral administration, it is rapidly converted to  
332 ganciclovir by intestinal and hepatic esterases. Pharmacokinetic studies in various populations  
333 have demonstrated similar systemic ganciclovir exposure (AUC) of intravenous ganciclovir and  
334 oral formulations (valganciclovir) [45-48]. Furthermore, clinical studies have demonstrated non-  
335 inferiority of oral formulation ganciclovir (valganciclovir) and IV ganciclovir for prevention  
336 and/or treatment of CMV disease in various populations [49, 50]. Thus, an oral alternative to

337 intravenous ganciclovir, with similar pharmacokinetics and equivalent clinical efficacy is  
338 available, and allows for convenient dosing for patients who are able to tolerate oral medications.

### 339 3.4 Standard dosing regimens

340 1. Treatment of active CMV infection (i.e. presence of CMV by culture, PCR, or antigen  
341 detection).

342 Dosing of intravenous ganciclovir is 10 mg/kg daily, given as 5 mg/kg every  
343 12 hours (adjusted for renal function). A minimum interval of 6 hours is  
344 required between the first and second dose.

345 2. Prevention of CMV reactivation (in CMV seropositive patients with latent CMV  
346 infection but without evidence of active CMV infection)

347 Dosing of intravenous ganciclovir is 5 mg/kg once daily (adjusted for renal  
348 function).

349 In this protocol we will use an initial 5 day regimen of twice daily dosing intravenous ganciclovir  
350 for hospitalized patients, followed by a daily dosing regimen of intravenous ganciclovir. All  
351 patients will receive a maximum of 28 days of study drug, provided that they have intravenous  
352 access. For patients discharged from the hospital prior to day 28, study drug will be discontinued  
353 at the time of hospital discharge or removal or intravenous access, whichever occurs earlier. For  
354 patients who remain hospitalized beyond day 28, study drug will be discontinued after day 28.  
355 Dose adjustments for reduced renal function will be done according to the package insert.

### 356 3.5 Safety profile

357 It is estimated that tens of thousands of persons have received either intravenous or oral  
358 formulation ganciclovir over the last ~20 years since its initial approval. Based on its efficacy and  
359 general tolerability, ganciclovir is currently recommended as a first-line agent for prevention &  
360 treatment of CMV infection and disease in HIV, solid-organ transplant, and stem cell transplant  
361 populations [51, 52]. See the package insert for more information (Appendix H, I).

362 See the package insert for more information.

### 363 3.6 Potential toxicities of ganciclovir

364 Ganciclovir is generally well-tolerated, with low rates of toxicity when given for less than 28  
365 days (the maximum possible duration of study drug in the present study). The most common  
366 adverse effects, which appear to be related to longer duration of exposure and use of concomitant  
367 drugs with similar toxicities, are various hematological adverse effects, most commonly  
368 leukopenia, neutropenia, and thrombocytopenia, all of which are considered reversible after drug  
369 discontinuation. The potential toxicities of ganciclovir have been extensively studied in vitro, in  
370 vivo and in placebo-controlled studies in humans. Based on animal and cell culture data  
371 ganciclovir is considered a potential human carcinogen, teratogen, and mutagen. It is also  
372 considered likely to cause inhibition of spermatogenesis. No human data exist that estimate the  
373 actual risk of these effects. Thus, it is used judiciously and handled as a cytotoxic drug in the  
374 clinical setting.

#### 375 3.6.1 Human toxicity data relevant to the proposed trial

376 In human studies (mostly involving immunocompromised solid-organ or stem-cell transplant  
377 recipients), the primary toxicity has been reversible leukopenia or neutropenia and has generally  
378 occurred after months of drug exposure and in patients receiving other marrow toxic agents.  
379 Baseline leukopenia/neutropenia is an uncommon finding in critically-ill patients with sepsis and  
380 ALI and is thus not anticipated to be a significant issue but will be closely monitored. For all  
381 patients receiving study drug (ganciclovir or valganciclovir), routine weekly monitoring (with  
382 absolute neutrophil and platelets counts) is recommended and will be performed in the present

383 study. Other potential side effects have generally been similar between ganciclovir and placebo  
384 groups in randomized trials.

### 385 **3.6.1.1 Hematotoxicity**

#### 386 **3.6.1.1.1 Platelets**

387 Most placebo-controlled randomized studies, including those in stem cell transplant patients, do  
388 not show a difference in the incidence of thrombocytopenia and platelet transfusion requirements  
389 [49, 50, 53-56]. However, there are rare anecdotal reports of ganciclovir-related pancytopenia.  
390 One study of ganciclovir prophylaxis in HCT recipients reported delayed platelet engraftment  
391 [57]. Overall, the potential to cause thrombocytopenia is considered low.

#### 392 **3.6.1.1.2 Neutropenia**

393 Neutropenia is the principal toxicity of ganciclovir and valganciclovir. The incidence is highest in  
394 HCT recipients and HIV-infected individuals, followed by pediatric patients with congenital  
395 CMV disease and SOT recipients. Many studies have demonstrated the effect occurs late after  
396 drug administration [49, 58, 59]. In fact, several studies in HCT recipients, the most susceptible  
397 population for this complication, show that the median time of onset is 5 weeks after start of drug  
398 administration. The most relevant data for the proposed study come from a recent randomized  
399 trial of valganciclovir prophylaxis in kidney transplant recipients [49]. In that study, the incidence  
400 of neutropenia within 28 days (the duration of treatment proposed in the present study) was only  
401 2%. Another recent randomized trial of valganciclovir vs. ganciclovir at treatment doses (900 mg  
402 twice daily and 5 mg/kg twice daily, respectively) for CMV disease in SOT recipients showed a  
403 neutropenia rate of 1.2% and 0%, respectively, at 21 days of treatment [50].

404 Ganciclovir-related neutropenia is reversible [49, 50, 58]. The time to recovery can be hastened  
405 by administration of G-CSF [52].

#### 406 **3.6.1.2 HIV & hematotoxicity**

407 Red blood cells: a trend towards anemia has been shown to occur in HIV-infected patients treated  
408 with valganciclovir. However, no strong evidence exists in transplant recipients and other patient  
409 populations, suggesting that the effect may be related to concomitant medications specific to the  
410 HIV setting. One recently completed phase III randomized trial of prolonged valganciclovir  
411 prophylaxis in HCT recipients, a population that would be considered at particularly high risk for  
412 this complication, did not show an increased rate of anemia or red blood cell transfusion  
413 requirements (Boeckh, 2008 ASBMT abstract). Other recent randomized trials also did not show  
414 an increased risk of anemia [49, 60, 61].

#### 415 **3.6.1.3 Renal toxicity**

416 Results from randomized trials do not support a role for ganciclovir or valganciclovir as causes of  
417 renal toxicity. None of the recently conducted randomized trials shows an increased risk or renal  
418 toxicity [49, 60], however, two earlier trials, one in heart transplant recipients with IV ganciclovir  
419 [62, 63] showed increased rates of renal insufficiency. While the potential to cause direct toxicity  
420 appears to be low, we will monitor renal function closely and adjust doses according to the  
421 creatinine clearance according to the package insert.

#### 422 **3.6.1.4 Neurotoxicity**

423 Rarely observed. Not statistically significant between study arms of most randomized trial except  
424 one study in HCT recipients [60]. This effect probably occurs only in a setting of concomitant  
425 drugs with neurotoxic potential and high blood levels in the setting of subclinical renal  
426 insufficiency.



427 **3.6.1.5 Carcinogenicity**

428 Ganciclovir and valganciclovir are considered potential human carcinogens (see package insert).  
 429 No studies have been performed to systematically assess this potential in humans. Although tens  
 430 of thousands of transplant and HIV infected patients have been treated with these compounds  
 431 over the past ~20 years, no reports of an increased risk of cancer have been published. However,  
 432 this does not rule out possible carcinogenic effect.

433 **3.6.1.6 Teratogenicity**

434 There are reports of ganciclovir-associated teratogenicity in humans, and this drug is  
 435 contraindicated in patients who are or are planning to become pregnant. For the purposes of this  
 436 study, all patients will be screened and excluded for pregnancy/possible pregnancy. For the three  
 437 months following receipt of ganciclovir, abstinence or an effective method of birth control for  
 438 both partners is recommended.

439 **3.6.1.7 Use of ganciclovir and valganciclovir in immunocompetent subjects**

440 Ganciclovir has been used in a limited number in patients with sepsis and mechanical ventilation  
 441 [30] and also in a clinical trial of adults with chronic fatigue syndrome [Montoya JG NIH Clinical  
 442 Trials.gov identifier: INCT00478465].

443 Numerous case reports have been published on the use of ganciclovir and valganciclovir in  
 444 individual patients with a variety of manifestations of CMV disease. No assessment can be made  
 445 on the toxicity of ganciclovir from these reports; however, the drug appeared to be tolerated well,  
 446 with adverse effects mimicking the spectrum known from immunocompromised patients.

447 **3.6.2 Summary of human toxicity data**

448 Ganciclovir-related neutropenia occurs very uncommonly in persons without underlying bone  
 449 marrow dysfunction and generally occurs at a median of 5 weeks after drug exposure (longer than  
 450 the maximum 28 days in the proposed study).

451 In patients without underlying bone marrow dysfunction, two recent trials showed very low rates  
 452 of neutropenia after 3-4 weeks of ganciclovir at doses similar to those proposed in this protocol  
 453 (2% within first 4 weeks with prophylaxis of 900 mg VGCV/day [49]; 1.2% at day 21 with 900  
 454 mg valganciclovir twice daily; 0% at day 21 with 5 mg/kg ganciclovir twice daily; [50].

455 There is no convincing evidence that ganciclovir or valganciclovir cause thrombocytopenia.

456 Anemia has been observed in HIV-infected subjects, but there is no evidence that it is a problem  
 457 in transplant patients or in the treatment of congenital disease.

458 There may be some risk of renal toxicity, however, this was not consistently observed across  
 459 randomized trials.

460 Other potential safety issues include teratogenicity and carcinogenicity.

461 **Table 3-1: Ganciclovir and valganciclovir toxicities**

| Adverse effects     | Human data | Documented in randomized trials | Expected incidence increase over placebo                      |
|---------------------|------------|---------------------------------|---------------------------------------------------------------|
| Neutropenia         | yes        | yes                             | < 2.0%                                                        |
| Thrombocytopenia    | yes        | no                              | no increase                                                   |
| Anemia              | yes        | some (HIV only)                 | no increase                                                   |
| Renal insufficiency | yes        | no (recent trials)              | no increase                                                   |
| GI effects          | yes        | yes                             | < 5% (oral phase)                                             |
| Tumors              | no         | no                              | no increase                                                   |
| Birth defects       | no         | no                              | no increase (all subjects will use appropriate contraception) |

462

463 **3.7 Other recent investigational applications of ganciclovir**

464 It has been proposed that valganciclovir might have a clinical benefit in the treatment of chronic  
465 fatigue syndrome. A clinical pilot trial has been performed (NIH Clinical Trials.gov identifier:  
466 INCT00478465) and results are forthcoming.

467 A randomized placebo-controlled pilot trial of valganciclovir has also been completed in patients  
468 with glioblastoma multiforme. Results were not publicly available at the time of protocol [NIH  
469 clinical trial.gov identifier: NCT00400322].

**470 4 RATIONALE**

471 The study is a multicenter, double-blind randomized placebo-controlled Phase II test-of-concept  
472 trial. The test-of-concept design will provide a preliminary assessment of study drug efficacy, as  
473 well as other related information that will be the basis for determining the need for and design of  
474 subsequent studies to complete a full evaluation of efficacy of ganciclovir in patients with  
475 respiratory failure (including acute lung injury) associated with severe sepsis or trauma.

**476 4.1 Rationale for study intervention**

477 We carefully considered two potential antiviral strategies: a “prophylactic” approach where  
478 antiviral therapy would be initiated prior to CMV reactivation in all eligible CMV seropositive  
479 patients and a “treatment” approach where antiviral therapy would be started only after CMV  
480 reactivation was documented (see Table). Despite potential limitations, use of a prophylactic  
481 strategy offers the best opportunity to assess for an effect of ganciclovir with an acceptable  
482 likelihood of toxicity. The major weaknesses of a treatment approach are that local CMV  
483 reactivation in the lung can occur even in the absence of reactivation in blood [28, 64] and that  
484 current methods of CMV measurement in blood (i.e. PCR) are not sensitive enough for detection  
485 of all CMV reactivation [65]. Indeed, a recent study showed that patients with sepsis had a much  
486 higher proportion of reactive CMV-specific immune response than what would have been  
487 expected based on viral load monitoring in the blood [65]; thus reactivation at sites other than the  
488 blood (e.g. the lung, salivary gland) is probably more common than viremia. Also, since the  
489 kinetics of CMV replication in critically ill patients is so rapid, significant CMV replication and  
490 its negative consequences would likely occur before antiviral intervention would be possible. A  
491 recent non-controlled study using a test and treat approach (i.e. ganciclovir treatment instituted on  
492 the basis of a positive blood test for CMV) failed to demonstrate a clinical benefit [30], probably  
493 related to the issues discussed above. Finally, for a treatment strategy to be effective generally,  
494 hospitals would need to implement rapid CMV diagnostic techniques that are not available at all  
495 centers.

496

**Table 4-1: Antiviral strategies considered for the clinical trial.**

|             | <b>Prophylactic</b>                                                                                                                                                                                                                                                                                                                                                                                                                                                                                   | <b>Treatment</b>                                                                                                                                                                                                                                                                                               |
|-------------|-------------------------------------------------------------------------------------------------------------------------------------------------------------------------------------------------------------------------------------------------------------------------------------------------------------------------------------------------------------------------------------------------------------------------------------------------------------------------------------------------------|----------------------------------------------------------------------------------------------------------------------------------------------------------------------------------------------------------------------------------------------------------------------------------------------------------------|
| <b>Pros</b> | <ul style="list-style-type: none"> <li>Conceptually more attractive (prevention rather than treatment) as it prevents all CMV reactivation at <u>any site (including lung) before</u> CMV-associated effects begin</li> <li>Logistically simpler</li> <li>Best opportunity to intervene <u>before</u> CMV-associated effects begin</li> <li>Standard of care for other populations where CMV is a clinical problem</li> <li>Best experimental and clinical data for preventing CMV effects</li> </ul> | <ul style="list-style-type: none"> <li>Minimizes drug exposure and toxicity by targeting only patients with documented CMV reactivation</li> </ul>                                                                                                                                                             |
| <b>Cons</b> | <ul style="list-style-type: none"> <li>Effect “diluted” by high proportion of non-reactivators</li> <li>Relative “over-treatment” with risk for drug toxicity</li> </ul>                                                                                                                                                                                                                                                                                                                              | <ul style="list-style-type: none"> <li>Logistically complicated</li> <li>May be <u>too late</u> to see any benefit of intervention (CMV-mediated effect cascade already initiated)</li> <li>Plasma CMV PCR is an insensitive marker of CMV reactivation (preferentially local reactivation in lung)</li> </ul> |

497

#### 498 4.2 Rationale for study population

499 The primary study population includes patients with respiratory failure (including acute lung  
500 injury) associated with severe sepsis or trauma. Such patients continue to have high rates of  
501 morbidity and mortality despite general improvements in medical care and in the management of  
502 patients with ALI. The inclusion of patients aged 18 years or greater is justified by published  
503 rates of CMV seropositivity that increase with age [17]. The 5-day enrollment window from the  
504 time of initial hospital admission is justified because CMV reactivation rarely occurs prior to day  
505 4 in this population [20]. The 5-day window also allows for the opportunity to enroll subjects at  
506 ARDSNET sites who were not able to be enrolled because of an unavailable surrogate during the  
507 24-48hr window from ALI onset that is typically used for other ARDSNET studies. Patients with  
508 immunocompromising conditions known to be associated with a risk for CMV who might be  
509 screened or treated for CMV reactivation are excluded. Patients taking medications that might  
510 affect the cytokine profiles that are the primary outcome variables of this trial will also be  
511 excluded. Other exclusions are designed specifically to minimize the risk for potential  
512 ganciclovir-associated toxicities (for example pregnancy, breast feeding, and neutropenia).  
513 Because the goal is to study the effects of ganciclovir on CMV reactivation and cytokine profiles  
514 in patients associated with severe sepsis or trauma, we will exclude patients at high risk of early  
515 death with little chance of observing the primary outcome.

### 516 4.3 Rationale for the choice of drug, dose & regimen

517 Among clinically available medications, only ganciclovir and its oral analogue valganciclovir are  
518 FDA approved for both the treatment and prevention of CMV infection and disease. There is  
519 extensive experience with ganciclovir during the ~20 years that it has been in widespread clinical  
520 use, and the most common reversible toxicities, leukopenia and neutropenia, are routinely  
521 monitored during therapy. Based on data shown in the Background section, the expected risk of  
522 neutropenia is estimated to be 2.5%. While other significant toxicities are described in the  
523 package insert, these must be carefully balanced against the potential benefit of ganciclovir in the  
524 population being studied. Indeed, the 6 month mortality after sepsis associated ARDS approaches  
525 50% is similar to the mortality seen after stem cell transplantation and higher than the mortality  
526 after solid organ transplantation—both settings in which ganciclovir and valganciclovir are  
527 routinely used. The dosing regimen will consist of initial twice daily dosing for 5 days (adjusted  
528 for renal function) to ensure adequate drug exposure during the period when earliest onset of  
529 CMV reactivation has been documented [20], followed by a daily dosing. There is significant  
530 experience with the use of ganciclovir in critically-ill patients and there are well-established  
531 FDA-approved dose adjustments for decreased renal function that will be used as recommended  
532 in the ganciclovir package insert. The 28-day total duration of study drug is justified by the period  
533 during which CMV reactivation occurs in this population [20].

### 534 4.4 Rationale for choice of endpoints

535 Because of the limited number of treatments shown to reduce mortality in critically ill patients  
536 there is a lack of generally accepted Phase II clinical trial endpoints in the field. Valid Phase II  
537 endpoints require robust evidence from multiple clinical trials that show that treatments that  
538 improve clinically significant outcomes also affect the proposed Phase II endpoint [66].  
539 Unfortunately, there simply is not sufficient evidence from multiple successful clinical trials in  
540 ALI to guide the selection of a single Phase II endpoint without being controversial [67].

541 However, inflammatory cytokines in the blood and BALF of patients with ALI, specifically IL-6  
542 and IL-8, have demonstrated the required criteria for Phase II endpoints [Prentice R Stat Med  
543 1995]. These biomarkers: (1) are reliably associated with mortality and other important clinical  
544 outcomes in ALI [12, 27, 68], and (2) are reduced by lung protective ventilation, the one therapy  
545 generally accepted to reduce mortality in ALI [9, 15, 16]. There are multiple lines of evidence  
546 linking CMV with each of these specific cytokines both in vitro and vivo [31, 32, 34, 37-39]. In  
547 this trial, we selected plasma measures rather than BALF because a substantial proportion of  
548 patients will have either died, been extubated, or discharged by the follow-up BALF at day 14,  
549 making statistical analysis problematic due to missing data. Day 14 was selected as the primary  
550 endpoint for measuring the cytokine response because of the known timing of CMV reactivation.  
551 We considered and rejected a number of potential primary surrogate endpoints including:  
552 ventilator free days (rejected because of the lack of evidence suggesting it is more sensitive than  
553 mortality alone or that it always moves with mortality), oxygenation (rejected because of the  
554 evidence from clinical trials of PEEP and inhaled nitric oxide that show that it does not move  
555 with mortality), and dead space (rejected because of the biologic hypothesis of the therapy being  
556 tested in this trial is linked to inflammation) [69, 70].

557 Secondary endpoints were selected either because of their known association with clinically  
558 significant outcomes in ALI or because they are clinically relevant themselves as outcomes or  
559 safety measures. Although the study is not specifically powered to detect significant differences  
560 in these secondary clinical endpoints, we have provided estimates of the differences that could be  
561 detected based on the sample size (see statistical section).

## 562 5 STUDY HYPOTHESES, OBJECTIVES AND ENDPOINTS

### 563 5.1 Primary Hypotheses

564 In CMV seropositive adults with severe sepsis or trauma associated respiratory failure including  
565 ALI, pulmonary and systemic CMV reactivation amplifies and perpetuates both lung and  
566 systemic inflammation mediated through specific cytokines, and contributes to pulmonary injury  
567 and multiorgan system failure,

#### 568 AND

569 Prevention of CMV reactivation with ganciclovir decreases pulmonary and systemic  
570 inflammatory cytokines that are hypothesized to be important in the pathogenesis of ALI and its  
571 complications.

#### 572 5.1.1 Primary Objective

573 To evaluate whether administration of ganciclovir reduces plasma IL-6 level (i.e. reduction  
574 between baseline and 14 days post-randomization) in immunocompetent patients with respiratory  
575 failure, including ALI, associated with severe sepsis or trauma.

#### 576 5.1.2 Primary Endpoint

577 Plasma IL-6 level (change between baseline and 14 days post-randomization between placebo &  
578 ganciclovir groups).  
579

### 580 5.2 Secondary Objectives

581 The secondary objectives of this study are:

- 582 • To evaluate whether ganciclovir affects CMV viral load parameters (i.e. incidence,  
583 peak levels, area under the curve) in blood, throat, and ETT aspirates among  
584 recipients relative to placebo recipients.
- 585 • To assess for differences between Day 0 and Day 7 levels of IL-6, IL-8, IL-10, TGF- $\beta$   
586 and TNF- $\alpha$  for both groups.
- 587 • To assess plasma cytokine levels IL-8, IL-10, TNF- $\alpha$  and sICAM-1 during the first 14  
588 days after randomization.
- 589 • To evaluate whether the proportion of organ system failure at by day 14 among  
590 ganciclovir recipients is less than the proportion among placebo recipients.
- 591 • To evaluate whether the duration of mechanical ventilation and ventilator-free days  
592 alive is different among ganciclovir recipients relative to placebo recipients.
- 593 • To evaluate whether ganciclovir administration affects safety parameters:
  - 594 ○ ANC < 500/mm<sup>3</sup>,
  - 595 ○ Use of GCSF,
  - 596 ○ Platelet count < 50,000/ml,
  - 597 ○ Hemoglobin < 8 mg/dL
  - 598 ○ Number of red blood cell and platelet products
  - 599 ○ AE > grade 2 (CTC criteria), and
  - 600 ○ We will also assess new tumor diagnoses by day 180 after randomization.

- 601           • To evaluate whether length of stay in hospital and/or ICU among ganciclovir recipients  
602           relative to placebo recipients is decreased.
- 603           • To evaluate mortality at 60 & 180 days among ganciclovir and placebo recipients.
- 604           • To assess for occurrence of bacteremia and fungemia among ganciclovir and placebo  
605           recipients.
- 606           • To evaluate functional assessment at 1 & 180 days among ganciclovir and placebo  
607           recipients.

### 608   **5.2.1 Secondary Endpoints**

609           A. Incidence of CMV reactivation at 28 days (blood, throat, endotracheal aspirate). Specifically,  
610           the following virologic parameters will be compared between the groups.

- 611           • Time to CMV reactivation at any level  
612           • Time to  $\geq 1,000$  copies per mL  
613           • Time to  $\geq 10,000$  copies per mL  
614           • Area under the curve  
615           • Peak viral load  
616           • Initial viral load

617           B. Additional cytokines will be compared between the groups. We focused on cytokines with  
618           proven association with ALI and CMV (samples will be stored, permitting additional analysis,  
619           see Ancillary Studies section below).

- 620           • Cytokines IL-6, IL-8, TNF- $\alpha$  & TGF- $\beta$  will be compared between groups at day 0 and  
621           day 7  
622           • Cytokines IL-6, IL-8, IL-10, TNF $\alpha$  & soluble ICAM-1 will be compared during the first  
623           14 days after randomization. Cytokines will be analyzed at each time point as well as over  
624           time (area under the curve). We will also compare peak levels between randomization and  
625           day 28 (end of treatment).

626           C. Clinical outcomes

- 627           • Organ system failure at 14 and 28 days [Multi-Organ Dysfunction Syndrome, (MODS)].  
628           Proportions will be compared between the groups.
- 629           • Duration of mechanical ventilation as assessed by ventilator days and ventilator-free days  
630           alive
- 631           • Bacteremia and/or fungemia. Culture-proven bloodstream infections will be assessed (all  
632           tests done as clinically indicated; no surveillance will be performed)
- 633           • Mortality at 60 and 180 days after randomization.
- 634           • Composite of survival status, ventilation status and IL-6 levels (ranked)
- 635           • Subset analysis of laboratory and clinical outcomes amongst subjects who survive at least  
636           7 days after randomization
- 637           • Subset analysis of laboratory and clinical outcomes amongst subjects who are  
638           mechanically ventilated for at least 7 through 14 days after randomization

639           D. Length of stay

- 640                   • ICU (days alive and not in the ICU by day 28)  
641                   • Hospital (days alive and not hospitalized by day 28 and 180)

642 E. CMV disease (biopsy-proven). For the purpose of this analysis only biopsy-proven CMV  
643 disease or CMV retinitis diagnosed by an ophthalmologist will be considered as previously  
644 defined [71]. All biopsy samples obtained for clinical reasons will be shipped to the coordinating  
645 site in Seattle for analysis. There will be no specific surveillance for CMV disease, only samples  
646 obtained for clinical reasons will be examined.

647 F. Safety. Safety monitoring will be by standard CTC criteria. In addition, specific expected  
648 adverse effects will be tracked. Laboratory monitoring will be done for one additional week after  
649 discontinuation of study drug (day 35, see below).

- 650                   • Number and severity of AEs and SAEs as defined in the Adverse Event section of the  
651 protocol  
652                   • Time to neutropenia (absolute neutrophil count [ANC] < 1000, <500 per mm<sup>3</sup>)  
653                   • Use of G-CSF  
654                   • Time to renal insufficiency (creatinine clearance < 60, < 30 ml/min)  
655                   • Time to thrombocytopenia (platelet count < 50,000, < 20,000 per mm<sup>3</sup>)  
656                   • Number of red cell and platelets products between randomization and day 35 after  
657 randomization

#### 658 **5.2.2 Collection and banking of DNA and RNA, and study samples**

659 In order to perform future investigations into the causes of ALI and any possible links between  
660 ALI outcomes and with treatment with ganciclovir, we will collect DNA and RNA samples for  
661 gene association and gene expression studies. Other study samples (blood, throat, endotracheal  
662 aspirates, clinical biopsy samples) as well as left-over material from clinical samples (e.g.  
663 endotracheal aspirates biopsy, autopsy material) will be kept in a repository for future studies of  
664 other herpesviruses. IRB approval will be obtained for studies not related to herpesviruses.

#### 665 **5.2.3 Ancillary studies**

666 Cryopreserved samples may be used to perform additional assays to support standardization and  
667 validation of laboratory assays, and to evaluate additional endpoints and associations of interest.  
668 These assays may include, but are not limited to PCR testing for other pathogens, gene  
669 association studies, additional cytokines and chemokines, proteomics and gene expression  
670 studies.



## 671 6 STATISTICAL CONSIDERATIONS

### 672 6.1 Power Calculations for primary hypotheses

#### 673 6.1.1 Primary Endpoint

674 The sample size of this phase II study was determined based on sample size calculations for the  
675 secondary endpoints, realistic and clinically relevant effect size and feasibility.

676 To estimate the required sample size for this trial with adequate statistical power for the primary  
677 endpoint, we used the rate of change in measured cytokine levels between days 1 and 3 in the 6  
678 ml/kg/min arms of the ARMA and ALVEOLI trials [9, 72]. We used as a benchmark the effect  
679 size (measured in percent reduction in mean blood IL-6 levels between days 1 and 3) in a large  
680 randomized trial of standard vs. lung protective ventilation [9, 16]. In that trial, a 26% reduction  
681 in mean plasma IL-6 levels between enrolment and day 3 was associated with a 22% reduction in  
682 mortality between study arms.

683 The mean and standard deviation in IL-6 and IL-8 levels at day 1 and day 3 was estimated from  
684 log-transformed data from the 6ml/kg/min arms of the ARMA and ALVEOLI trials [9, 72]. The  
685 rate of decline was assumed to be linear over time. A 10% rate of dropout (deaths, missing data)  
686 by day 14 was assumed among the 160 enrolled patients, with a two-sided test and type I error  
687 rate of 5%. The standard deviations at different days and the inter-person correlations were used  
688 to calculate the standard deviation of the difference between baseline and day 14, using the  
689 following table:

690 **Table 6-1: Calculations of the standard deviation of the difference between baseline and day 14.**

| Cytokine Outcomes | Mean at day 0 | Std at day 0 | Mean at day 14 | Std at day 14 | Inter-person correlation | 80% power  | 90% power  |
|-------------------|---------------|--------------|----------------|---------------|--------------------------|------------|------------|
|                   |               |              |                |               |                          | difference | difference |
| IL6               | 5.8           | 1.72         | 1.09           | 1.38          | 0.5                      | 0.74       | 0.85       |
|                   |               |              |                |               | 0.6                      | 0.67       | 0.77       |
|                   |               |              |                |               | 0.7                      | 0.58       | 0.67       |
|                   |               |              |                |               | 0.8                      | 0.49       | 0.56       |
| IL8               | 4.19          | 1.44         | 2.32           | 1.18          | 0.5                      | 0.62       | 0.72       |
|                   |               |              |                |               | 0.6                      | 0.56       | 0.65       |
|                   |               |              |                |               | 0.7                      | 0.49       | 0.56       |
|                   |               |              |                |               | 0.8                      | 0.41       | 0.47       |

691

692 As shown in the table above, for the primary endpoint of the change in blood IL-6 level between  
693 day 1 and day 14, the study will have 80% power to detect a difference between groups of at least  
694 16%.

#### 695 6.1.2 CMV reactivation

696 The power to detect differences in rate of CMV reactivation between placebo and  
697 ganciclovir/valganciclovir groups is shown in the table below. We estimated several reactivation  
698 rates in the placebo group based on published data, ranging from 20% to 30% ( $R_{\text{placebo}}$ ). We also  
699 assumed several efficacy scenarios for ganciclovir, ranging from 80% (RR 0.2) to 70% (RR 0.3).

700 **Table 6-2: Power to detect the difference in CMV reactivation rate between two treatments with two-**  
 701 **sided and type I error rate of 5%. (using Fisher exact test).**

| $R_{\text{placebo}}$ | Relative risk<br>( $R_{\text{drug}}/R_{\text{placebo}}$ ) | Power (%) |
|----------------------|-----------------------------------------------------------|-----------|
| 0.2                  | 0.2                                                       | 85.6      |
|                      | 0.3                                                       | 69.6      |
| 0.25                 | 0.2                                                       | 93.9      |
|                      | 0.3                                                       | 82.0      |
| 0.3                  | 0.2                                                       | 97.7      |
|                      | 0.3                                                       | 90.2      |

702

### 703 6.1.3 Secondary Clinical Endpoints.

704 Although the study is not specifically powered to demonstrate differences in clinical endpoints,  
 705 we also estimated the effect size for the secondary endpoints of length of hospitalization (ICU  
 706 and total) and ventilation free days (at 28 and 60 days post-enrollment).

707 **Table 6-3 Minimum detectable difference ( $\mu_p - \mu_t$ ) and % difference ( $\frac{\mu_p - \mu_t}{\mu_p} * 100$ ) between**  
 708 **two treatments with 80% or 90% power, two-sided and type I error rate of 5% (n=160).**

| Outcomes                        | $\mu_p$ | Std <sub>p</sub> | 80% power       |                                   | 90% power       |                                   |
|---------------------------------|---------|------------------|-----------------|-----------------------------------|-----------------|-----------------------------------|
|                                 |         |                  | $\mu_p - \mu_t$ | $\frac{\mu_p - \mu_t}{\mu_p}$ (%) | $\mu_p - \mu_t$ | $\frac{\mu_p - \mu_t}{\mu_p}$ (%) |
| Length of hospitalization       | 30      | 18               | 8.0             | 26.8                              | 9.3             | 31.0                              |
| Length in ICU                   | 19      | 14               | 6.2             | 32.9                              | 7.2             | 38.0                              |
| Ventilation free within 60 days | 37      | 22               | 9.8             | 26.5                              | 11.4            | 30.7                              |
| Ventilation free within 28 days | 13      | 10               | 4.5             | 34.3                              | 5.2             | 39.7                              |

709

710 For instance, for the length of hospitalization, we will be able to detect a difference of 8 days  
 711 between the two groups with 80% power and a difference of 9.3 days with 90% power.

## 712 6.2 Statistical Analyses for endpoints.

### 713 6.2.1 Primary Endpoint.

714 We will first compare baseline characteristics in assessment of randomization using chi-square or  
 715 t-tests. To test for whether the mean difference in primary endpoint (intervention vs. control)  
 716 differs from 0, we will use a 2 sample t-test. In addition, multivariate models will be built  
 717 including baseline subject characteristics and risk factors for CMV reactivation [20] using linear  
 718 regression or ANCOVA, or the semiparametric efficient and robust method of Davidian et al.  
 719 [73].

720

721 The primary analysis will evaluate the endpoint in survivors at Day 14. If subjects are missing a  
 722 primary endpoint for reasons other than death, then the analysis method will accommodate the  
 723 missing data by assuming endpoints are missing at random, and modeling whether subjects have  
 724 their primary endpoint observed. If the rate of death by Day 14 differs between the two groups,  
 725 then the analysis in survivors may be biased. If there is evidence for a differential death rate, then  
 726 a sensitivity analysis may be conducted to evaluate how the estimated mean difference changes  
 727 with a range of assumptions about the degree of possible selection bias or we will estimate  
 728 survivor average causal effect (SACE) following Hayden et al. [77]. The sensitivity analysis  
 729 method of Shepherd et al. [74] will be used, which was designed to address “truncation by death.”

**730 6.2.2 Secondary endpoints**

731 For the quantitative secondary endpoints, the same method used for the primary endpoint will be  
732 used. For the dichotomous secondary endpoints such as CMV reactivation, the Kaplan-Meier  
733 method will be used to estimate, for each group, the probability of not yet experiencing CMV  
734 reactivation by Day 28. A 95% confidence interval about the group difference in event rates will  
735 be computed using the two Kaplan-Meier estimates and the two Greenwood variance estimates. A  
736 Z-statistic based on these estimates will be used for testing for a group difference in event rates.  
737 Composite endpoints will be analyzed using a modification of the generalized Wilcoxon test, as proposed  
738 by Finkelstein et al. [76].

**739 6.2.3 Other pre-specified analyses**

740 In addition to the intent-to-treat analysis (i.e. all randomized patients), a modified intent-to-treat  
741 analysis will be performed (i.e. patients randomized and who have received at least one dose of  
742 study drug[primary endpoint]), as well as an analysis of patients who have been ventilated for at  
743 least 7 or 14 days. In addition, we will test for an interaction of treatment period (pre and post  
744 oral drug use) and the primary treatment differences at the study conclusion. We will analyze  
745 subsets of study population (including before and after the 3.4. protocol amendment) on key laboratory and  
746 clinical endpoints. Furthermore, association analyses of risk factors for CMV reactivation will be  
747 performed [20].

**748 6.3 Randomization scheme**

749 The randomization sequence will be obtained by computer-generated random numbers and  
750 provided to each site by the Statistical and Data Management Center (SDMC) at the coordinating  
751 center. The randomization will be block-randomized by site. At each institution, the pharmacist  
752 with primary responsibility for drug dispensing is charged with maintaining security of the  
753 randomization list.

**754 6.4 Blinding**

755 Patients and site staff (except for site pharmacists) will be blinded as to patient treatment arm  
756 assignments (e.g., study drug or placebo). Study drug assignments are accessible to those site  
757 pharmacists, contract monitors, and SDMC staff who are required to know this information in  
758 order to ensure proper trial conduct. Any discussion of study drug assignment between the site  
759 clinical and pharmacy staff is prohibited. The DSMB members also are unblinded to treatment  
760 assignment in order to conduct review of trial safety.

761 Unblinding procedures are discussed in Section 9.15.

**762 6.4.1 Missing data**

763 The absence of data pertaining to some of secondary endpoints may be problematic if patients are  
764 discharged from the ICU, extubated, or expire prior to our pre-specified time points for  
765 endotracheal aspirates and serum collection. If the ganciclovir intervention reduces duration of  
766 ventilation, it may bias the results because patients cannot undergo endotracheal aspirate if they  
767 are extubated. Since this is a small trial, missing data cannot be imputed and will be dropped from  
768 the dataset. To minimize missing data and to maximize CMV detection rate, we have attempted  
769 to choose a time point for the endotracheal aspirate (Day  $7 \pm 1$  day) when approximately 40% of  
770 patients in the study are expected to be alive and intubated.

**771 6.5 Planned analyses prior to end of study****772 6.5.1 Safety**

773 During the course of the trial, blinded analyses of safety data will be prepared twice yearly for  
774 review by the DSMB. Blinded ad hoc safety reports may also be prepared for DSMB review at  
775 the request of the safety review team (see Section 14.3). A scheduled interim safety analysis at

776 midpoint will be performed. The team leadership must approve any other requests for blinded  
 777 safety data prior to the end of the study. The DSMB decides whether to remain blinded to the  
 778 treatment assignments at each meeting. Operating details are specified in the DSMB charter.

#### 779 **6.5.1.1 Interim safety analysis.**

780 It is expected in this trial that approximately  $L = 48$  of the 160 participants will have death events  
 781 relative to the safety endpoint. A safety interim analysis is planned to be performed at the  
 782 midpoint of the 24th event.

783 Guidelines for early termination at the interim analysis due to concerns on the safety endpoint  
 784 should (i) adjust for the nature of interim monitoring that involves repeated testing over time, (ii)  
 785 should reflect particular caution given the relative benefit-to-risk profile of the two arms.

786 Specifically, a recommendation for stopping will be based on strong evidence for the hazard ratio  
 787 (treatment / placebo, HR) of death being less than 1 or greater than 1. The single interim analysis  
 788 will be performed when approximately 50% of the expected total number of primary endpoints  
 789 has been observed. The Pocock “upper boundary” to establish an elevated event rate in the  
 790 intervention group preserves the (one-sided) 0.025 false positive error rate relative to the  
 791 hypothesis:

792  $H_0$ : the event rate for the intervention group relative to control  $\leq 1.00$

793 The Pocock “lower boundary” to establish an elevated event rate in the control group preserves  
 794 the (one-sided) 0.025 false positive error rate relative to the hypothesis:

795  $H_1$ : the event rate for the control group relative to intervention  $\leq 1.00$

796 For illustration, the table below presents the Pocock boundaries for the hazard ratio (HR)  
 797 estimates that would lead to rejection of  $H_0$  at the interim analysis performed when one has  
 798 observed 50% and 100% of the trial’s expected total of 48 death events.

799 Table 6-4: Interim analysis assumptions.

| Information Fraction<br>(% of Total Events) | Reject $H_0$<br>HR $\leq 1.00$ | Nominal one-sided p-<br>values for rejection of $H_0$ | Reject $H_1$<br>HR $\geq 1.00$ |
|---------------------------------------------|--------------------------------|-------------------------------------------------------|--------------------------------|
| 50% (24 events)                             | $\geq 2.40$                    | $P \leq 0.016$ ; $Z = 2.15$                           | $\leq 0.42$                    |

805  
 806 Observe that, for the total of 24 events at the interim analysis, to reach the Pocock boundary for a  
 807 lower death rate in the intervention group, the control group would need to have at least 10 excess  
 808 events (7 in intervention group versus 17 in the control group) at the 50% information fraction.

809 Observe that, for the total of 24 events at the interim analysis, to reach the Pocock boundary for a  
 810 lower death rate in the control group, the intervention group would need to have at least 10 excess  
 811 events (7 in control group versus 17 in the intervention group) at the 50% information fraction.

812 The Lan-DeMets implementation [74] of the Pocock guideline will be used to provide flexibility  
 813 in the timing and number (in the case of unplanned DSMB meetings) of interim analyses.

814

#### 815 **6.5.2 Other endpoint analyses**

816 Distribution will be limited to those with a need to know for the purpose of informing future trial-  
 817 related decisions. The Protocol Leadership must approve any other requests for prior to the end of  
 818 the study. Any analyses conducted prior to the end of the study should not compromise the

819 integrity of the trial in terms of participant retention or safety or immunogenicity endpoint  
820 assessments.

**821 7 SELECTION AND WITHDRAWAL OF SUBJECTS****822 7.1 Study population**

823 One hundred sixty adults will be randomized in a 1:1 ratio to receive either the study drug or  
824 placebo. All patients entered into this study will have established respiratory failure, including  
825 ALI, associated with either severe sepsis or trauma. By virtue of their intubation, all patients  
826 requiring mechanical ventilator will be considered critically ill.

827 Final eligibility determination will depend on results of laboratory tests, medical history, and  
828 physical examinations. Those determined to be eligible, based on the inclusion and exclusion  
829 criteria, will be enrolled in the study. Investigators should always use good clinical judgment in  
830 considering a subject's overall appropriateness for trial participation. Some subjects may not be  
831 appropriate for enrollment even if they meet all inclusion/exclusion criteria because medical,  
832 psychiatric, social, or logistic conditions may make evaluation of safety and/or efficacy difficult.

**833 7.2 Randomization**

834 Patients meeting inclusion and exclusion criteria will be randomized to standard ICU care  
835 (including ARDSNET lung protective ventilation and weaning protocols) + intervention or  
836 placebo.

**837 7.3 Inclusion criteria**

- 838 1. Subject/next of kin informed consent
- 839 2. Age  $\geq$  18 years
- 840 3. CMV IgG seropositive. The following tests are acceptable:
  - 841 a. FDA licensed test in a local lab approved by the coordinating center (FHCRC,  
842 Seattle, WA).
  - 843 b. Test in central study lab (ARUP, Salt Lake City, UT)
  - 844 c. A report that patient has previously been tested and found to be CMV seropositive  
845 at any time (a credible next of kin report is acceptable; confirmatory test will be  
846 done but results are not required for randomization)
- 847 4. Intubated and requiring mechanical positive pressure ventilation (including Acute Lung  
848 Injury/ARDS (EA Consensus Definition))
- 849 5. Meets criteria for either:
  - 850 a. Severe sepsis criteria (as defined in Appendix G) within a 24-hour time period  
851 within the 120 hour window
  - 852 Or
  - 853 b. Trauma with respiratory failure and an ISS score  $>$  15 within a 24 hour time period,  
854 and within the 120 hour window (where mechanical ventilation is not due solely to  
855 a head injury)
- 856 6. On the day of randomization (by local criteria):
  - 857 a. Not eligible for SBT (use of sedation and/or vasopressor does not specifically  
858 contraindicate SBT)
  - 859 Or
  - 860 b. Failed SBT
  - 861

862 **7.4 Exclusion criteria**

- 863 1. BMI > 60 (1<sup>st</sup> weight during hospital admission)
- 864 2. Known or suspected immunosuppression, including:
- 865 a. HIV+ (i.e. prior positive test or clinical signs of suspicion of HIV/AIDS; a negative
- 866 HIV test is not required for enrollment)
- 867 b. stem cell transplantation:
- 868 i. within 6 months after autologous transplantation or
- 869 ii. within 1 years after allogeneic transplantation (regardless of
- 870 immunosuppression)
- 871 iii. greater than 1 year of allogeneic transplantation if still taking systemic
- 872 immunosuppression or prophylactic antibiotics (e.g. for chronic graft versus
- 873 host disease)
- 874 Note: if details of stem cell transplantation are unknown, patients who do not take
- 875 systemic immunosuppression and do not take anti-infective prophylaxis are
- 876 acceptable for enrollment and randomization.
- 877 c. solid organ transplantation with receipt of systemic immunosuppression (any time)
- 878 d. cytotoxic anti-cancer chemotherapy within the past three months (Note: next-of-kin
- 879 estimate is acceptable)
- 880 e. congenital immunodeficiency requiring antimicrobial prophylaxis (e.g. TMP-SMX,
- 881 dapsone, antifungal drugs, intravenous immunoglobulin)
- 882 f. receipt of one or more of the following in the indicated time period:
- 883 i. within 6 months: alemtuzumab, antithymocyte/antilymphocyte antibodies
- 884 ii. within 3 months: immunomodulator therapy (TNF-alpha antagonist, rituximab,
- 885 tocilizumab, IL1 receptor antagonist and other biologics)
- 886 iii. within 30 days:
- 887 1. corticosteroids >10 mg/day (chronic administration, daily average over the
- 888 time period)
- 889 a. topical steroids are permissible
- 890 b. use of hydrocortisone in “stress doses” up to 100 mg four times a
- 891 day (400mg/daily) for up to 4 days prior to randomization is
- 892 permissible
- 893 c. use of temporary short-term (up to 2 weeks) increased doses of
- 894 systemic steroids (up to 1 mg/kg) for exacerbation of chronic
- 895 conditions are permissible
- 896 2. methotrexate (> 10.0 mg/week)
- 897 3. azathioprine (>75 mg/day)

898 Note: if no information on these agents is available in the history and no direct or

899 indirect evidence exists from the history that any condition exists that requires

900 treatment with these agents (based on the investigator’s assessment), the subject may

- 901 be enrolled. For all drug information, next-of-kin estimates are acceptable. See  
902 Appendix C for commonly prescribed immunosuppressive agents.
- 903 3. Expected to survive < 72 hours (in the opinion of the investigator)
- 904 4. Has been hospitalized for > 120 hours (subjects who are transferred from a chronic care  
905 ward, such as a rehabilitation unit, with an acute event are acceptable).
- 906 5. Pregnant or breastfeeding (either currently or expected within one month).
- 907 Note: for women of childbearing age (18-60 years, unless documentation of surgical  
908 sterilization [hysterectomy, tubal ligation, oophorectomy]), if a pregnancy test has not  
909 been done as part of initial ICU admission work-up, it will be ordered stat and  
910 documented to be negative before randomization. Both urine and blood tests are  
911 acceptable.
- 912 6. Absolute neutrophil count < 1,000/mm<sup>3</sup> (if no ANC value is available, the WBC must  
913 be > 2500/mm<sup>3</sup>)
- 914 7. Use of cidofovir within seven (7) days of patient randomization. The use of the  
915 following antivirals is permitted under the following conditions:
- 916 a. Ganciclovir, foscarnet, high-dose acyclovir, or valacyclovir until the day of  
917 randomization
- 918 b. Acyclovir as empiric therapy for central nervous system HSV or VZV infection  
919 until the diagnosis can be excluded
- 920 c. For enrolled patients during the active study drug phase, acyclovir, famciclovir,  
921 valacyclovir for treatment of HSV or VZV infection as clinically indicated.
- 922 8. Currently enrolled in an interventional trial of an investigational therapeutic agent  
923 known or suspected to have anti-CMV activity or to be associated with significant  
924 known hematologic toxicity (Note: confirm eligibility with one of the study medical  
925 directors at the coordinating site).
- 926 9. At baseline patients who have both a tracheostomy, and have been on continuous 24-  
927 hour chronic mechanical ventilation.
- 928 10. Patients with Child Class C Cirrhosis.
- 929 11. Patients with pre-existing interstitial lung disease.
- 930

## 931 7.5 Subject withdrawal

- 932 Under certain circumstances, an individual patient may be terminated from participation in this  
933 study. Specific events that will result in early termination include:
- 934 • Site investigator decides to terminate participation for reasons of patient's safety or to prevent  
935 compromising the scientific integrity of the study,
  - 936 • It is determined that side effects are severe,
  - 937 • New scientific developments indicate that the treatment is not in the patient's best interest,
  - 938 • Patient or next of kin refuses further participation,
  - 939 • Subject has been inappropriately enrolled based on inclusion/exclusion criteria (e.g. when  
940 information through next of kin was inaccurate); these subjects may be replaced.



941           • Study is terminated.

942           If study drug is withdrawn, all safety and follow up procedures will be continued as described in  
943           the protocol.

944 **8 STUDY DRUG ACQUISITION, PREPARATION, & ADMINISTRATION**

945 **8.1 Study drug & placebo formulation**

946 Intravenous ganciclovir and matching placebo.

947 **8.2 Acquisition of study drugs & placebos**

948 Study drug will be provided Genentech, a member of the Roche Group and shipped to the  
949 University of Washington Investigational Drug Pharmacy. After expiration of the initial study lot  
950 intravenous study drug may also be acquired commercially (placebo infusions will be prepared at  
951 the site pharmacies). From there it will be distributed to the study sites.

952 **8.3 Storage of study drugs & placebos**

953 Study drug will be stored as per manufacturer's recommendations.

954 **8.4 Administration of study drugs & placebos**

955 Ganciclovir (or IV placebo) will be administered via central or peripheral venous access. Renal  
956 dysfunction and hemodialysis

957 Ganciclovir doses must be adjusted according to renal function as per package insert (reference  
958 pharmacy manual pages 11 and 12). A subject who is on hemodialysis should continue IV dosing  
959 according to the package insert.

960 **8.5 Pharmacy Records**

961 The site pharmacist is required to maintain complete records of all study drugs received from the  
962 sponsor and subsequently dispensed.

**963 9 CLINICAL PROCEDURES****964 9.1 Patient identification & recruitment**

965 Patients with ALI will be identified via prospective screening of all ICU patients. This process is  
966 done by trained and experienced research coordinators who review charts using a standardized  
967 screening tool. Additionally, patients may be identified by the attending physician based on  
968 eligibility criteria.

**969 9.2 Informed Consent**

970 Informed consent is the essential processes of ensuring that study subjects or legal guardians fully  
971 understand what will and may happen to them while participating in a research study. Before any  
972 protocol-specific questions are asked or procedures to determine protocol eligibility performed, a  
973 screening consent form or protocol-specific consent form (described below) must be signed.  
974 Patients or family members must be provided with a copy of all consent forms that they sign.

975 Since all potential patients will be intubated and sedated, initial consent will be from the patients'  
976 legally authorized representative. Subsequent consent from the patient will be obtained whenever  
977 possible. Interested surrogates will be given information about the study, explaining potential  
978 risks. They will then undergo informed consent. Consent forms will be approved by the Human  
979 Subjects Committee.

980 Participation in this study is voluntary. The nature of the study will be fully explained to each  
981 patient during the informed consent process. If the patient is deemed unable to provide written  
982 informed consent, informed consent for the patient's participation must be obtained from a legally  
983 authorized representative using practices and procedures that are acceptable as defined by local  
984 law and the Institutional Review Board. In this situation (the use of surrogate consent),  
985 subsequent consent will be obtained from the patient when possible. The patient (or authorized  
986 representative, when applicable) will have the opportunity to ask questions. The patient (or  
987 authorized representative, when applicable) and the individual who performs the consent  
988 discussion will sign an informed consent document. The investigator will retain the informed  
989 consent document according to Good Clinical Practice. HIPAA authorization will also take place  
990 during the informed consent process.

991 The determination of appropriate "next-of-kin" will be made in accordance with the standard  
992 practices used in provision of medical care. Detailed documentation of all attempts to obtain  
993 consent from the patient and/or the patient's next-or-kin will be kept.

**994 9.2.1 Consenting process**

995 Informed consent is not limited to the signing of the consent form; it also includes all written or  
996 verbal study information site staff discuss with the patient, before and during the trial.

**997 9.2.2 Consent form**

998 The informed consent form documents that a prospective patient or their agent (1) understands  
999 the potential risks, benefits, and alternatives to participation, and (2) is willing to participate in a  
1000 study.

1001 Each site is responsible for developing a protocol-specific consent form for local use, based on  
1002 the sample protocol-specific consent form provided along with the protocol. The consent form(s)  
1003 must be developed in accordance with local IRB/IEC requirements and the principles of informed  
1004 consent as described in Title 45, Code of Federal Regulations (CFR) Part 46 and Title 21 CFR,  
1005 Part 50, and in the International Conference on Harmonisation (ICH) E6: Good Clinical Practice:  
1006 Consolidated Guidance 4.8. It must be approved by all responsible ethical review bodies before  
1007 any subjects can be deemed to have consented for the study.

1008

**1009 9.3 Screening procedures**

1010 Screening procedures are done to determine eligibility and to provide a baseline for comparison  
1011 of data. Baseline data are obtained during screening. All inclusion and exclusion criteria must be  
1012 assessed within 120 hours before randomization. Once the consent form is signed, the patient is  
1013 considered enrolled in the study. However, in case of provisional enrollment due to pending  
1014 CMV serology or pregnancy test, the patient can only be randomized once these test results are  
1015 available.

1016 After the appropriate informed consent has been obtained and before randomization, the  
1017 following procedures are performed:

- 1018 • Clinical laboratory tests as defined in the inclusion and exclusion criteria, including:
  - 1019 ○ Serum or urine pregnancy test—the results of this must be negative
  - 1020 before proceeding, since ganciclovir is suspected to be teratogenic.
  - 1021 ○ CMV serology. CMV serostatus testing may also be done under a waiver of
  - 1022 consent if permitted by the study site's Institutional Review Board (IRB).
  - 1023 CMV testing may be performed at the local site using FDA approved kits or
  - 1024 at a central reference laboratory. If a waiver of consent for CMV testing
  - 1025 using left-over blood has been granted by the local IRB, consent for this
  - 1026 testing during the screening process is not required. If a waiver of consent is
  - 1027 not permitted, a separate CMV serostatus prescreening consent form will be
  - 1028 used.
  - 1029 ○ Absolute neutrophil count/total white blood cell counts
- 1030 • Collection of medical history
- 1031 • Assessment of concomitant medications
- 1032 • Obtaining of patient demographics in compliance with the NIH Policy on Reporting
- 1033 Race and Ethnicity Data: Subjects in Clinical Research, Aug. 8, 2001. Available at
- 1034 <http://grants.nih.gov/grants/guide/notice-files/NOT-OD-01-053.html>

1035

**1036 9.4 Patient Registration**

1037 Patients will be registered with the central registration office in Seattle, Washington (SCHARP)  
1038 via FAX or email.

**1039 9.5 Randomization procedure**

1040 Randomization will occur after confirmation of positive CMV serostatus and negative pregnancy  
1041 test. The first dose of study drug should be started within 24 hours of randomization.  
1042 Randomization will occur via a web-based system at the SDMC, which automatically notifies the  
1043 site pharmacist of the treatment assignment. Patients will be stratified at the time of  
1044 randomization according to treatment center.

1045 When the patient is randomized, the following information is required by NIH reporting  
1046 guidelines: date of birth, race/ethnicity, and gender. For the purpose of this study, each patient  
1047 will be assigned a study number, which will be used for all communications with outside  
1048 institutions to assure confidentiality.

**1049 9.6 First dose of study drug**

1050 The first dose of study drug is considered study Day 1. The first study day will be defined as the  
1051 24 hour period following the first dose of study drug and all subsequent study days will start

1052 accordingly. At baseline, but before administration of study drug, the following procedures will  
1053 need to be performed:

- 1054 • Blood: Genomic analysis (genetic polymorphisms, gene expression,  
1055 proteomics), Creatinine, Cytokine, Platelets, CMV PCR, CBC  
1056 w/differential.
- 1057 • Endotracheal (ETT) aspirate. Collect an ETT aspirate specimen at  
1058 baseline ( $\pm 1$  day) and every fourth day ( $\pm 2$  days) while the patient  
1059 remains intubated at the time that this procedure is routinely performed  
1060 by respiratory therapy. Specimens will be labeled and stored frozen for  
1061 subsequent CMV PCR analysis at the coordinating lab at FHCRC.
- 1062 • Throat swab: CMV PCR.
- 1063 • Clinical Assessments: Organ failure score, Vital status, Assessment of  
1064 concomitant medications

### 1065 **9.7 Intervention (Study drug administration)**

1066 Patients will be randomized in a 1:1 ratio to receive either ganciclovir or placebo. Study drug  
1067 delivery will begin within 24 hours of randomization. The first day of study drug is considered  
1068 Day 1 of this study.

- 1069 • Study drug will be administered for a maximum of 28 days. For the initial 5 days of study  
1070 treatment, the dose will be ganciclovir 5mg/kg or Placebo IV q 12hr.
- 1071 • If the patient is discharged from the hospital prior to day 28 or when intravenous access is  
1072 removed, the patient will stop receiving study drug.
- 1073 • After 5 days, the dose will be reduced to ganciclovir 5mg/kg or placebo IV once daily.
- 1074 • Ganciclovir doses must be adjusted according to renal function as per package insert.

1075

### 1076 **9.8 Co-interventions**

1077 All patients will receive standard intensive care unit care, which includes ventilator management  
1078 (ARDS Network lung protective ventilation protocols will be used at all sites, Appendix D),  
1079 antimicrobial therapy, blood glucose control, and ICU sedation. Many of these co-interventions  
1080 occur under local protocols used as a part of routine clinical care.

### 1081 **9.9 Specimen collection**

1082 Patients will undergo serial blood draws at study entry ( $\pm 1$  day of randomization) and on Day  
1083  $7\pm 1$ . Not more than 200 mL of blood will be collected over the initial 35 days of the study.  
1084 Endotracheal (ETT) aspirates will be collected every four days while intubated.

1085 Collect an ETT aspirate specimen at baseline ( $\pm 1$  day) and every fourth day ( $\pm 2$  days) while the  
1086 patient is intubated every three to four days at the time this procedure is routinely performed by  
1087 respiratory therapy. Specimen will be collected, labeled, and stored frozen for subsequent CMV  
1088 PCR analysis at the coordinating lab (Boeckh Lab at FHCRC). After Day 35 or hospital  
1089 discharge, patients will not be followed daily, but they will be contacted at [Days 60 & 180] for a  
1090 telephone follow-up to ascertain health status and adverse events.

### 1091 **9.10 Survey study**

1092 Patients will complete a survey on Day 1 and at 6 months. The survey will take about 10 minutes  
1093 to complete and will be faxed via Data Fax. The purpose of this survey is to compare functional  
1094 assessment at Day 1 and 6 months between ganciclovir and placebo recipients.

1095 **9.11 Post-Enrollment Procedures**

1096 See the schedule of procedures for specific time points (including permissible windows) in  
1097 Appendix A.

- 1098                   • Blood:
- 1099                    ○ Genomic analysis (gene expression and proteomics) - Day 11  
1100                    (± 1 day)
- 1101                    ○ Creatinine, Cytokine, Platelets, CMV PCR, CBC w/differential-  
1102                    Days 4, 7, 11, 14, 18, 21, 25, 28, 35 (all ± 1 day)
- 1103                   • Endotracheal (ETT) aspirate every fourth day (± 2 days) while intubated.  
1104                    Throat swab: CMV PCR - Days 4, 7, 11, 14, 18, 21, 25, 28, 35  
1105                    (all ± 1 day)
- 1106                   • Clinical Assessments: Organ failure score, Vital status, Assessment of  
1107                    concomitant medications - Days 4, 7, 11, 14, 18, 21, 25, 28, 35  
1108                    (all ± 1 , day), Day 60 ± 3 days, Day 180 (± 14 days)
- 1109                   • For women of childbearing potential, a pregnancy test will be performed  
1110                    at the time of hospital discharge
- 1111                   • Because ganciclovir and valganciclovir carry a black box warning for  
1112                    tumors in lab animals (see sections 3.6.1.5 and 3.6.2.), at the 6 months  
1113                    follow-up call subjects will be asked if there is any known new  
1114                    development of a malignant tumor. If a new tumor is reported, records  
1115                    will be requested from the primary care physician or hospital. The 6  
1116                    month time point has been selected in analogy to of the follow-up in a  
1117                    recent randomized trial of valganciclovir given for 6 months (Clinical  
1118                    Trials.gov identifier NCT00478465) in which such assessment was made  
1119                    6 months after discontinuation of drug administration.

1120 The schedule of post-enrollment procedures will be modified for patients who have been  
1121 discharged before Day 35.

1122 For all patients, it is critical that the Day 14 laboratory specimens are obtained for primary  
1123 endpoint analysis. All patients must have Day 21 and Day 28 visits.

1124 Follow up for this study population has been historically difficult. Despite effort by sites to obtain  
1125 all study specimens, it is expected that there may be missed blood draws and or throat swabs after  
1126 discharge from the hospital. Because these missed labs are expected, they will not be considered  
1127 to be unanticipated problems or protocol violations. In the event a patient cannot be reach for the  
1128 180 Day follow up, survival data may be determined through death registry records.

1129 **9.12 Monitoring of renal function**

1130 Renal function will be monitored at least weekly throughout the active study drug dosing period  
1131 and for one additional week. Study drug dose will be adjusted based on the calculated creatinine  
1132 clearance according to the package inserts (Appendix H, I).

1133 **9.13 Monitoring for and managing neutropenia**

1134 **Suggested Management of Neutropenia.** Short-term neutropenia is an expected adverse event  
1135 of ganciclovir/valganciclovir, although the incidence is projected to be low in the ICU setting.

- 1136 1. Neutropenia will be monitored at least weekly throughout the active study period and for one  
1137 additional week (day 35 after randomization or one week after hospital discharge for patients  
1138 discharged prior to day 28).

- 1139 2. If ANC drops below  $1000/\text{mm}^3$ , study drug will be temporarily held.  
1140 3. Concomitant drugs should be reviewed and adjusted as feasible.  
1141 4. ANC monitoring should continue (i.e. approximately twice a week without G-CSF; once a  
1142 week with G-CSF) until the ANC is  $> 1000/\text{mm}^3$ .  
1143 5. A dose of G-CSF may be administered (5 microgram/kg) at the discretion of the treating  
1144 physician.  
1145 6. If the ANC increases  $> 1500/\text{mm}^3$  study drug may be resumed.  
1146 7. If the neutropenia recurs at levels of  $< 1000/\text{mm}^3$ , study drug should be discontinued  
1147 permanently, but the patient should continue to undergo all other study procedures & be  
1148 followed for safety & other endpoints.  
1149 8. If the duration of neutropenia (ANC  $< 500/\text{mm}^3$ ) is  $\geq 5$  days (with or without G-CSF), the  
1150 event should be reported as an SAE (see SAE reporting section).  
1151

## 1152 9.14 Pregnancy

1153 If a patient becomes pregnant during the course of the study, no administration of study drug  
1154 should be given but other procedures should be completed unless medically contraindicated. The  
1155 investigator will submit a pregnancy report form to the coordinating center. The Reporting Plan  
1156 and timeline is described in the table in Section 11.1. If the subject terminates from the study  
1157 prior to the pregnancy outcome, the site must keep in touch with the patient in order to ascertain  
1158 the pregnancy outcome. Pregnancy status for all women of childbearing potential will also be  
1159 assessed at the Day 60 and Day 180 follow up phone calls.

## 1160 9.15 Unblinding

### 1161 9.15.1 Unblinding criteria

1162 Unblinding may be precipitated either by conclusion of the study or an emergency situation, in  
1163 discussion between the site PI and protocol chair(s) (Drs. Boeckh or Limaye). All patients or  
1164 family members can be informed of their treatment assignment at the conclusion of the study,  
1165 after all key analyses are complete, and upon written request.

1166 In the event of an emergency situation, patients may be unblinded prematurely. Emergency  
1167 unblinding decisions will be made by the site PI only after discussion with one of the protocol  
1168 chairs (Drs. Boeckh or Limaye). Additionally, if a serious adverse event (SAE) occurs which  
1169 qualifies for expedited reporting to one or more regulatory agencies, the patient's treatment  
1170 assignment will be unblinded, if specifically requested by the regulatory agencies, the  
1171 institutional review board (IRB), or the DSMB. All cases of unblinding should be discussed with  
1172 one of the protocol chairs (Drs. Boeckh or Limaye).

### 1173 9.15.2 Unblinding procedures

1174 After one of the protocol chairs (Drs. Boeckh or Limaye) agrees with the site PI to unblind the  
1175 patient's treatment assignment, the protocol chair will request the coordinating site's statistical  
1176 center (SCHARP) to send a password-protected email to the site PI containing the treatment  
1177 assignment for the particular patient. The code should not be broken except in an emergency  
1178 where knowledge of the patient's treatment assignment is absolutely necessary for the further  
1179 management of the patient, or in the context of review of an expedited adverse event as described  
1180 in the adverse event section of the protocol. If the treatment assignment is unblinded under any  
1181 other circumstances, it will be considered a protocol violation. This information should also be  
1182 recorded in the patient's CRF.

**1183 10 LABORATORY PROCEDURES**

1184 Routine clinical laboratory tests will be performed through the hospital-based clinical laboratory.  
1185 In this critically ill population, laboratory tests shall be those deemed necessary based upon  
1186 clinical indications of the patient; others will be ordered as per protocol.

**1187 10.1 Laboratory procedures**

1188 Laboratory procedures include but are not limited to:

- 1189 • Baseline whole blood sample for biomarker studies.
- 1190 • Endotracheal aspirates at baseline ( $\pm$  1 day of randomization) and then every fourth day  
1191 ( $\pm$  2 days) while the patient is intubated for CMV viral load, cytokine analysis, neutrophil  
1192 enumeration.
- 1193 • Aliquot of endotracheal aspirate and/or lung biopsy done for clinical purposes.
- 1194 • For patients who undergo autopsy, a sample of lung tissue (frozen and paraffin-  
1195 embedded) is requested.
- 1196 • Blood samples at baseline, then twice weekly until hospital discharge at least, then one  
1197 week after discontinuation of study drug.
- 1198 • For CMV viral load, cytokine analysis, and safety labs (CBC with neutrophil count with  
1199 platelets, and Creatinine).
- 1200 • Twice weekly throat swabs CMV DNA PCR while hospitalized, then one week after  
1201 discontinuation of study drug.
- 1202 • Bacteremia/fungemia in clinically-performed blood cultures, VAP.

**1203 10.2 Future use of stored specimens**

1204 The investigators intend to store specimens from patients. These samples will be used for future  
1205 testing and research related to furthering the understanding of CMV and other viral infections to  
1206 the extent authorized in each study site's informed consent form, or as otherwise authorized under  
1207 applicable law. Other testing on specimens will only occur after review and approval by the IRB  
1208 of the researcher requesting the specimens and at the coordinating site.

**1209 10.3 Biohazard containment**

1210 As the transmission of CMV and other blood-borne pathogens can occur through contact with  
1211 contaminated needles, blood, and blood products, appropriate precautions will be employed by all  
1212 personnel in the drawing of blood and shipping and handling of all specimens for this study, as  
1213 currently recommended by the CDC and the NIH or other locally appropriate agencies.

1214 All dangerous goods materials, including Biological Substances, Category A or Category B, must  
1215 be transported according to instructions detailed in the International Air Transport Association  
1216 (IATA) Dangerous Goods Regulations.



## 1217 11 ADVERSE EVENT REPORTING

### 1218 11.1 Adverse Events

1219 Investigators will determine daily (while hospitalized and at study visits after discharge) if any clinical  
1220 adverse experiences occur during the period from randomization through 7 days after the last dose of  
1221 study drug. The investigator will evaluate any changes in laboratory values and physical signs and will  
1222 determine if the change is clinically important and different from what is expected in the course of  
1223 treatment of patients with ALI. If reportable adverse experiences occur, they will be recorded on the  
1224 adverse event case report form.

#### 1225 For this trial, a *reportable adverse event* is defined as:

- 1226 1. Any clinically important untoward medical occurrence in a patient receiving study drug or  
1227 undergoing study procedures which is different from what is expected in the clinical course of a  
1228 patient with ALI/ARDS,  
1229 OR,  
1230 2. Any clinically important, untoward medical occurrence that is thought to be associated with the study  
1231 drug or procedures, regardless of the “expectedness” of the event for the course of a patient with ALI.

1232 *Expected events for ALI* are untoward clinical occurrences that are perceived by the investigator to occur  
1233 with reasonable frequency in the day to day care of patients with ALI treated in an intensive care unit  
1234 with mechanical ventilation. Examples of adverse events that are expected in the course of ALI include  
1235 transient hypoxemia, agitation, delirium, nosocomial infections, skin breakdown, and gastrointestinal  
1236 bleeding. Such events, which are often the focus of prevention efforts as part of usual ICU care, will not  
1237 be considered reportable adverse events unless the event is considered by the investigator to be associated  
1238 with the study drug or procedures, or unexpectedly severe or frequent for an individual patient with ALI.  
1239 Examples of unexpectedly frequent adverse events would be repeated episodes of unexplained  
1240 hypoxemia. This would be in contrast to an isolated episode of transient hypoxemia (e.g. SpO<sub>2</sub> ~85%),  
1241 related to positioning or suctioning. This latter event would not be considered unexpected by nature,  
1242 severity or frequency.

1243 All such reportable AEs will be graded according to CTC guidelines. The severity of each event should be  
1244 classified into one of five defined categories as follows:

- 1245 • Grade 1 Mild
- 1246 • Grade 2 Moderate
- 1247 • Grade 3 Severe
- 1248 • Grade 4 Life Threatening or Disabling
- 1249 • Grade 5 Death

1250 These reportable adverse events as defined above will be recorded on the adverse event case report form.

1251 Note: Study drug specific laboratory events (e.g. hematologic values, renal function) will be collected as  
1252 secondary safety endpoints.

## 1253 11.2 Serious Adverse Events

1254 Investigators will report all events that are **serious AND unexpected AND study-related**, as defined in  
1255 the reporting guidelines found in the next section, to the FHCRC by fax or email within 7 business days  
1256 of becoming aware of event. Sites must notify their local Institutional Review Board (IRB) in a timely  
1257 manner, according to local IRB guidelines.

1258 The following will also be reported within 7 business days, even if not meeting expedited SAE reporting  
1259 criteria:

- 1260 • **ANC < 500/mm<sup>3</sup> for a period ≥ 5 days**
- 1261 • **Death in the presence of neutropenia (ANC < 500/mm<sup>3</sup> for any duration)**

1262 FHCRC will report all serious, unexpected, and study-related adverse events to the DSMB by fax or  
1263 email within 7 business days of being notified of the event. SAE forms received by FHCRC will be sent  
1264 to participating sites for submission to their respective IRBs, according to their local IRB guidelines. The  
1265 DSMB will also review all adverse events during scheduled interim analyses. FHCRC will distribute the  
1266 written summary of the DSMB's periodic review of adverse events to investigators for submission to their  
1267 respective Institutional Review Boards in accordance with NIH guidelines.

1268 FHCRC will also determine if the serious adverse event is unexpected for ganciclovir (or valganciclovir  
1269 for patients assigned to oral study drug prior to approval of protocol version 3.4). Unexpected for  
1270 ganciclovir/valganciclovir is defined as any event not listed in the Cytovene, Cymevene or Valcyte  
1271 package insert.

1272 Investigators must also report Unanticipated Problems, regardless of severity, associated with the study  
1273 drug or study procedures to FHCRC within 7 business days after becoming aware of the event, and to site  
1274 IRBs according to local guidelines. An unanticipated problem is defined as follows:

1275 **Unanticipated Problem (UP):** any incident, experience, or outcome that meets all of the following  
1276 criteria:

- 1277 • Unexpected, in terms of nature, severity, or frequency, given the research procedures that are  
1278 described in the protocol-related documents, such as the IRB-approved research protocol and  
1279 informed consent document; and the characteristics of the subject population being studied;
- 1280 • Related or possibly related to participation in the research, in this guidance document, possibly  
1281 related means there is a reasonable possibility that the incident, experience, or outcome may have  
1282 been caused by the procedures involved in the research;
- 1283 • Suggests that the research places subjects or others at a greater risk of harm (including physical,  
1284 psychological, economic, or social harm) than was previously known or recognized.

## 1286 11.3 Reporting Adverse Events

1287 1. Assuring patient safety is an essential component of this protocol. Each participating investigator  
1288 has primary responsibility for the safety of the individual participants under his or her care. The  
1289 site Principal Investigator will evaluate all local adverse events. The Study Coordinator must  
1290 view patient records for possible adverse events throughout the study period. All reportable  
1291 adverse events occurring within the study period must be reported in the participants' case report  
1292 forms.

- 1293 2. Investigators will report all *serious, unexpected, AND study-related* adverse events to the FHCRC  
1294 within 7 business days by fax or email. Sites must notify their local Institutional Review Board in  
1295 a timely manner, according to local IRB guidelines.
- 1296 3. Definitions of Adverse Events
- 1297 a. A *serious* adverse event is any event that is fatal or immediately life threatening, is  
1298 permanently disabling, or severely incapacitating, or requires or prolongs inpatient  
1299 hospitalization. Important medical events that may not result in death, be life threatening, or  
1300 require hospitalization may be considered serious adverse events when, based upon appropriate  
1301 medical judgment, they may jeopardize the patient or subject and may require medical or surgical  
1302 intervention to prevent one of the outcomes listed above.
- 1303 i. Life-threatening means that the patient was, in the view of the investigator, at  
1304 immediate risk of death from the reaction as it occurred. This definition does not include  
1305 a reaction that, had it occurred in a more serious form, might have caused  
1306 death. Assessment of the cause of the event has no bearing on the assessment of the  
1307 event's severity.
- 1308 b. An *unexpected* event is any experience not identified by the type, severity, or frequency in  
1309 the current study protocol or an event that is unexpected in the course of treatment for ALI or  
1310 ARDS.
- 1311 c. Adverse events will be considered to be study-related if the event follows a reasonable  
1312 temporal sequence from a study procedure and could readily have been produced by the study  
1313 procedure.
- 1314 d. Organ failures or death related to ALI or ARDS or the patient's underlying condition that  
1315 are systematically captured by the protocol should not be reported as adverse events *unless they*  
1316 *are considered to be study related.*
- 1317
- 1318

1319 All SAEs must be reported to the Fred Hutchinson Cancer Research Center in a timely fashion to  
 1320 allow expedited report to the DSMB and other entities (see **Figure 11-1: safety reporting chart**).  
 1321 The **following** table summarizes the reporting timelines:

| Type of Event                           | Definition of Reportable Event                                                                                        | Reporting Plan                                                                                | Reporting Timeline (after becoming aware of event)                                                                                        |
|-----------------------------------------|-----------------------------------------------------------------------------------------------------------------------|-----------------------------------------------------------------------------------------------|-------------------------------------------------------------------------------------------------------------------------------------------|
| <b>Serious Adverse Events (SAE)</b>     | Any untoward medical event that is:<br><br>Serious<br><b>AND</b><br>Unexpected<br><b>AND</b><br>Related to study drug | Site to local IRB                                                                             | According to local IRB guidelines                                                                                                         |
|                                         |                                                                                                                       | Site to coordinating center                                                                   | Initial report within 7 business days                                                                                                     |
|                                         |                                                                                                                       | Coordinating center to DSMB chair<br><br>DSMB Chair to determine if full meeting is necessary | Within 7 business days of receipt of initial report from site<br><br>Within 72 hours after Chair receives report from coordinating center |
|                                         |                                                                                                                       | Coordinating center to NHLBI & participating sites                                            | Within 7 business days of receiving initial report                                                                                        |
|                                         |                                                                                                                       | Coordinating center to Genentech, A member of the Roche Group                                 | Within 7 business days of receipt of initial report                                                                                       |
|                                         |                                                                                                                       | Coordinating center to report to FH IRB                                                       | Within 7 business days of receipt of initial report from site                                                                             |
| <b>Neutropenia</b>                      | ANC < 500/mm for $\geq$ 5 days                                                                                        | SAME AS ABOVE                                                                                 | SAME AS ABOVE                                                                                                                             |
| <b>Death</b>                            | Death in the presence of neutropenia                                                                                  | SAME AS ABOVE                                                                                 | SAME AS ABOVE                                                                                                                             |
|                                         | Death not meeting reporting definition above                                                                          | Site to local IRB                                                                             | According to local IRB guidelines                                                                                                         |
|                                         |                                                                                                                       | Site to coordinating center                                                                   | Annually                                                                                                                                  |
|                                         |                                                                                                                       | Coordinating center to DSMB                                                                   | Included in report prepared for each DSMB meeting                                                                                         |
|                                         |                                                                                                                       | Coordinating center to NHLBI & participating sites                                            | Annually                                                                                                                                  |
|                                         |                                                                                                                       | Coordinating center to Genentech, A member of the Roche Group                                 | Annually                                                                                                                                  |
| Coordinating center to report to FH IRB | Annually                                                                                                              |                                                                                               |                                                                                                                                           |

1322

|                              |                                                                                                                                                                                                                                                                                                                                                                                                                                                                                                |                                                               |                                                                           |
|------------------------------|------------------------------------------------------------------------------------------------------------------------------------------------------------------------------------------------------------------------------------------------------------------------------------------------------------------------------------------------------------------------------------------------------------------------------------------------------------------------------------------------|---------------------------------------------------------------|---------------------------------------------------------------------------|
| <b>Unanticipated problem</b> | <p>Any untoward event that is:</p> <ul style="list-style-type: none"> <li>• Unexpected, in terms of nature, severity, or frequency</li> </ul> <p><b>AND</b></p> <ul style="list-style-type: none"> <li>• Related or possibly related to participation in the research</li> </ul> <p><b>OR</b></p> <p>Suggests that the research places subjects or others at a greater risk of harm (including physical, psychological, economic, or social harm) than was previously known or recognized.</p> | Site to local IRB                                             | According to local IRB                                                    |
|                              |                                                                                                                                                                                                                                                                                                                                                                                                                                                                                                | Site to coordinating center                                   | Within 7 business days via memo                                           |
|                              |                                                                                                                                                                                                                                                                                                                                                                                                                                                                                                | Coordinating center to DSMB Chair                             | Within 7 business days of receipt of information from site                |
|                              |                                                                                                                                                                                                                                                                                                                                                                                                                                                                                                | Coordinating center to NHLBI & participating sites            | Within 7 business days of receipt of information from site                |
|                              |                                                                                                                                                                                                                                                                                                                                                                                                                                                                                                | Coordinating center to Genentech, A member of the Roche Group | Within 7 business days of receipt of information from site                |
|                              |                                                                                                                                                                                                                                                                                                                                                                                                                                                                                                | Coordinating center to FH IRB                                 | Within 7 business days of receipt of information from site                |
| <b>Pregnancy</b>             | ALL                                                                                                                                                                                                                                                                                                                                                                                                                                                                                            | Site to local IRB                                             | According to local IRB guidelines                                         |
|                              |                                                                                                                                                                                                                                                                                                                                                                                                                                                                                                | Site to coordinating center                                   | Within 7 business days (via pregnancy report form)                        |
|                              |                                                                                                                                                                                                                                                                                                                                                                                                                                                                                                | Coordinating center to DSMB                                   | Within 7 business days of receiving pregnancy report form                 |
|                              |                                                                                                                                                                                                                                                                                                                                                                                                                                                                                                | Coordinating center to NHLBI & participating sites            | Within 7 business days of receiving pregnancy report form                 |
|                              |                                                                                                                                                                                                                                                                                                                                                                                                                                                                                                | Coordinating center to Genentech, A member of the Roche Group | Within 7 business days of receiving pregnancy report form                 |
|                              |                                                                                                                                                                                                                                                                                                                                                                                                                                                                                                | Coordinating center to FH IRB                                 | Within 7 business days of receiving pregnancy report form                 |
| <b>Adverse Event</b>         | <p>Any untoward medical event that is considered by the investigator to be:</p> <ul style="list-style-type: none"> <li>• Unexpectedly severe or more frequent than typical course of ALI</li> </ul> <p><b>OR</b></p> <ul style="list-style-type: none"> <li>• Have any relationship to study drug</li> </ul>                                                                                                                                                                                   | Site to local IRB                                             | According to local IRB guidelines                                         |
|                              |                                                                                                                                                                                                                                                                                                                                                                                                                                                                                                | Site to coordinating center                                   | AEs reported as required on CRFs. CRFs to be completed on a timely basis. |
|                              |                                                                                                                                                                                                                                                                                                                                                                                                                                                                                                | Coordinating center to DSMB                                   | Included in report prepared for each DSMB meeting                         |
|                              |                                                                                                                                                                                                                                                                                                                                                                                                                                                                                                | Coordinating center to NHLBI & participating sites            | Annually - summarized from CRFs in database                               |
|                              |                                                                                                                                                                                                                                                                                                                                                                                                                                                                                                | Coordinating center to Genentech, A member of the Roche Group | Every 6 months – summarized from CRFs in database                         |
|                              |                                                                                                                                                                                                                                                                                                                                                                                                                                                                                                | Coordinating center to FH IRB                                 | Annually – summarized from CRFs in database                               |

1324 All sites will be responsible for compliance with local safety reporting guidelines.

1325

1326

1327

1328

1329

1330

1331

1332

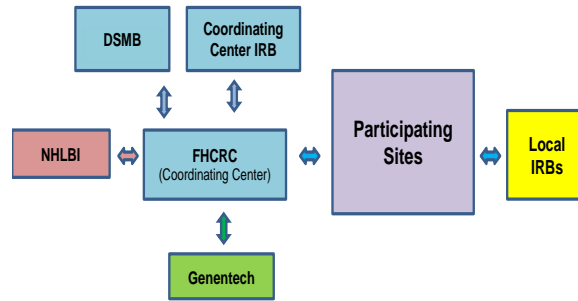

1333 **Figure 11-1: Safety reporting chart.**

1334

1335 The SAE Report will include the following information (as available):

1336

Patient ID

1337

Description of the SAE (onset date, severity, causal relationship)

1338

Basic demographic information

1339

Outcomes attributed to the event

1340

Summary of relevant test results, laboratory data, and other relevant history

1341

The first and last dates of study drug administration

1342

Statement whether study drug was discontinued or schedule modified

1343

Statement whether the event abated after study drug was discontinued/modified

1344

Statement whether the event recurred after reintroduction of the study drug if it had been discontinued or held

1345

1346 Participating sites will be provided with SAE report forms and contact numbers for transmitting  
1347 the reports.

#### 1348 **11.4 Relationship to study drug**

1349

All AEs will have a causality assessment performed at the time of reporting the event to document the Investigator's perception of causality. There is currently no standard international nomenclature to define causality. For the purposes of this study, causality will be assigned using the following criteria:

1351

1352

1353

|                    |                                                                                                                                                                                                                                                                                                     |
|--------------------|-----------------------------------------------------------------------------------------------------------------------------------------------------------------------------------------------------------------------------------------------------------------------------------------------------|
| Definitely related | The event cannot be attributed to the patient's underlying medical condition or other concomitant therapy and there is a compelling temporal relationship between the onset of the events and study drug administration that leads the Investigator to believe that there is a causal relationship. |
| Probably related   | There is a clinically plausible time sequence between the onset of the AE and the study drug administration. The AE is unlikely to be caused by a concurrent/underlying illness, other drugs or procedures.                                                                                         |
| Possibly related   | There is a clinically plausible time sequence between the onset of the AE and study drug administration, but the AE could also be attributed                                                                                                                                                        |

|             |                                                                                                                                                                                                    |
|-------------|----------------------------------------------------------------------------------------------------------------------------------------------------------------------------------------------------|
|             | to a concurrent/underlying disease, other drugs, or procedures.<br>“Possibly related” should be used when the study drug administration is one of several biologically plausible causes of the AE. |
| Not related | The patient’s underlying medical condition or concomitant therapy can easily be identified as the cause of the event and there is no temporal relationship between the event and the study drug.   |

1354

**1355 11.5 Pregnancy**

1356 A pregnancy is not an adverse event. If a patient becomes pregnant while enrolled in the study  
 1357 following administration of study drug, administration of study drug will be discontinued  
 1358 immediately and the patient will be followed through the outcome of the pregnancy. The  
 1359 investigator will submit a pregnancy report form to the coordinating center. The Reporting Plan  
 1360 and timeline pregnancy is described in the table in Section 11.1.

**1361 11.6 Breaking the blind**

1362 The blind will not routinely be broken for SAE’s. If the event is highly unusual or the knowledge  
 1363 of the study arm assignment is critical for optimal management of an individual patient, the case  
 1364 will be referred to the DSMB chair who will make the decision whether or not to break the blind.

**1365 11.7 Stopping rules**

1366 The study may be stopped prematurely if an excess rate of toxicity is observed. The DSMB will  
 1367 monitor throughout the study and there will be scheduled interim analyses for safety (see  
 1368 Statistical section).

## 1369 12 DATA MANAGEMENT CONSIDERATIONS

### 1370 12.1 Data Collection

1371 Each patient will be assigned an identification number to be used for all patient data. Links to  
1372 patient name and identifiers will be maintained and stored in files on computers protected by  
1373 password and in locked office cabinets. Research staff and physicians will remain blinded until  
1374 the study is completed.

1375 Chart abstraction for demographic, laboratory, and physiologic data will occur at study entry,  
1376 daily until the intervention is discontinued, weekly for the remainder of the hospitalization, and  
1377 again at hospital discharge or death. While patient remains hospitalized, review of the hospital  
1378 record will occur daily throughout the hospitalization (to Day 35) to identify any adverse events.

1379 All information will be faxed via Data Fax.

### 1380 12.2 Data Management

1381 Data are entered onto paper case report forms and then faxed into the SDMC via Data Fax. The  
1382 database has been configured such that missing, extreme, or inconsistent values will be detected  
1383 at the time of submission. Sites will receive queries to reconcile inconsistencies.

### 1384 12.3 Quality Control and Quality Assurance

1385 By signing this protocol, the Investigator/Sponsor agrees to be responsible for implementing and  
1386 maintaining quality control and quality assurance systems with written Standard Operating  
1387 Procedures (SOPs) to ensure that the study is conducted and data are generated, documented, and  
1388 reported in compliance with the protocol, accepted standards of Good Clinical Practice, and all  
1389 applicable federal, state, and local laws, rules, and regulations relating to the conduct of the  
1390 clinical study.

1391 By signing this protocol, the investigators agree to conduct the study in an efficient and diligent  
1392 manner and in conformance with this protocol; to follow generally accepted standards of Good  
1393 Clinical Practice; and to follow all applicable federal, state, and local laws, rules, and regulations  
1394 relating to the conduct of the clinical study.

1395 The investigator also agrees to allow monitoring, audits, Institutional Review Board review and  
1396 regulatory agency inspection of study-related documents and procedures and provide for direct  
1397 access to all study-related source data and documents.

1398 The investigator shall prepare and maintain complete and accurate study documentation in  
1399 compliance with Good Clinical Practice standards and applicable federal, state, and local laws,  
1400 rules, and regulations.

1401 The investigator has the responsibility of explaining the correct use of the study drug to the site  
1402 personnel, insuring that instructions are followed properly, and maintaining accurate records of  
1403 study drug dispensing and collection.

### 1404 12.4 Study monitoring

1405 Because of the risk profile of the study drug which carries a black box warning on its package  
1406 insert and has the potential of hematologic toxicity we will perform study monitoring of  
1407 intermediate intensity with an average of 4 monitoring visits per site. All sites will have a start-up  
1408 visit by a study monitor, one visit after 3 patients have been enrolled, one visit at approximately  
1409 50% of enrollment and one final and close-out visit. Briefly, we will perform 100% monitoring of  
1410 inclusion and exclusion criteria, SAEs, length of stay, and ventilation data. In addition, every 5<sup>th</sup>  
1411 patient will be monitored 100%. A detailed monitoring plan is shown in Appendix F.



1412 **13 ETHICAL CONSIDERATIONS & HUMAN SUBJECTS PROTECTIONS**

1413 **13.1 Ethical Review**

1414 This study will be conducted in accordance with the ethical principles stated in the Declaration of  
1415 Helsinki (1996) and applicable guidelines on Good Clinical Practice.

1416 The investigator will obtain approval of the protocol and the informed consent from the local  
1417 Institutional Review Board before the study may begin. IRB approval will also be obtained  
1418 locally from each additional clinical site before the study commences at that site. The investigator  
1419 will supply the following to the Institutional Review Board and Data Safety and Monitoring  
1420 Board:

- 1421 • Study protocol and appendices.
- 1422 • Informed consent document and updates.
- 1423 • Safety alerts.

1424 This study will be registered with the U.S. NIH's clinical trials registry ClinicalTrials.gov.

1425 **13.2 Potential risks of study drugs and procedures**

1426 The following table presents common, less common, and uncommon risks based on experience  
1427 with this drug in humans and animal data. This information will be communicated to patients in  
1428 the sample informed consent form.

1429 **Table 13-1 Summary of potential risks of study medication and administration**

|                                           |                                                                                                                                                                                                                                                                                |
|-------------------------------------------|--------------------------------------------------------------------------------------------------------------------------------------------------------------------------------------------------------------------------------------------------------------------------------|
| Common                                    | Valganciclovir: gastrointestinal: diarrhea, nausea, vomiting, abdominal pain.                                                                                                                                                                                                  |
| Less common                               | Blood: leucopenia, neutropenia, anemia (ganciclovir and valganciclovir)                                                                                                                                                                                                        |
| Uncommon or rare                          | Ganciclovir and valganciclovir:<br>Central nervous system: fever, headache, insomnia, paresthesia, and<br>peripheral neuropathy.<br>Ocular: retinal detachment.<br>Effects on the fetus and on pregnancy (which is why pregnant women will be<br>excluded from participating). |
| Unknown frequency<br>or theoretical risks | Ganciclovir and valganciclovir:<br>Cancer                                                                                                                                                                                                                                      |

1430

1431 **13.3 Risks of Endotracheal Aspirates**

1432 ETT aspiration is routinely performed on intubated patients by respiratory therapy as part of  
1433 their clinical care routine to help clear respiratory secretions. There are no known risks to this  
1434 procedure and would be considered inappropriate care if this procedure were not performed.

1435 **13.4 Potential benefit of enrollment**

1436 ALI, respiratory failure, severe sepsis and trauma carry a high mortality, and consume millions of  
1437 health care dollars each year. Any treatment that is found to impact outcomes in ALI could have a  
1438 substantial societal benefit. Ganciclovir is not routinely administered to ALI patients, so  
1439 individual patients participating in this trial have an opportunity to receive this treatment through  
1440 the study. If ganciclovir is ultimately found to positively affect outcomes, individuals in this study  
1441 may benefit. It is possible, though, that an individual may not derive any direct benefit from  
1442 participating in this trial, or even experience toxicities or adverse outcomes.

1443 **14      **PROTOCOL OVERSIGHT AND GOVERNANCE****

1444 **14.1    **Principal investigator****

1445           The PI will adhere to requirements of the Code of Federal Regulations. Additionally, the primary  
1446           Principal Investigator/Sponsor will sign the final clinical study report for this study, confirming  
1447           that to the best of her/his knowledge the report accurately describes the conduct and results of the  
1448           study.

1449 **14.2    **Protocol Leadership Team****

1450           The Protocol Leadership Team will be responsible for administrative oversight of the study,  
1451           provides the overall operational direction for the trial, and is responsible for the conduct of the  
1452           trial according to the highest scientific and ethical standards, as well as approving revisions and  
1453           amendments to the protocol. The Protocol Leadership Team will remain blinded to the treatment  
1454           group assignment of individual patients during the course of the study.

1455 **14.3    **Safety review team****

1456           The safety review team (SRT) will review all clinical and laboratory safety data during the course  
1457           of the study. The SRT is composed of the following members: protocol chair and co-chair (Drs.  
1458           Boeckh and Limaye), and the project manager (registered nurse). The clinician members of the  
1459           SRT are responsible for the review of the clinical safety reports, communication with the DSMB,  
1460           reporting to IRB and Genentech, a member of the Roche Group as outlined above.

1461 **14.4    **Data Safety and Monitoring Plan (Appendix F)****

1462           Investigators are responsible for monitoring the safety of patients who have entered this study.  
1463           While hospitalized, patients will be assessed daily for evaluation of adverse events by the  
1464           research nurse and principal investigator, with the latter acting as medical monitor.

1465           The investigator is responsible for appropriate medical care of patients during the study. The  
1466           investigator remains responsible to follow, through an appropriate health care option, adverse  
1467           events (AEs) that are serious, cause the patient to discontinue before completing the study, or are  
1468           ongoing at the time of study completion. The investigator will maintain responsibility for  
1469           forwarding of SAEs to the DSMB and Institutional Review Board. The patient will be followed  
1470           until the event resolves or stabilizes. Frequency of follow-up is left to the discretion of the  
1471           investigator.

1472 **14.5    **Data and Safety Monitoring Board****

1473           A Data and Safety Monitoring Board (DSMB) will be established. This DSMB will assess the  
1474           effects of the study drug during the trial and may give advice to the study team leadership. The  
1475           members of the committee are independent of the University of Washington, Fred Hutchinson  
1476           Cancer Research Center, Genentech, a member of the Roche Group, and clinical investigators  
1477           participating in this trial, and will not have any other involvement in the study, nor will they have  
1478           any relation to study subjects.

1479           Prior to beginning patient accrual, the DSMB will review the research protocol and identify any  
1480           potential problems with randomization and implementation of the protocol. At this early phase,  
1481           the DSMB will also review plans for data and safety monitoring to ensure that the frequency of  
1482           monitoring is appropriate for the ganciclovir intervention.

1483 During patient accrual, all serious adverse events will be reported to the chairperson of the  
1484 DSMB. The DSMB may recommend any steps to ensure the safety of study subjects and the  
1485 integrity of the trial.

1486 The DSMB will be involved with planned interim analyses. The interim monitoring guidelines  
1487 that the DSMB will follow will be described in the Statistical Analysis Plan. The DSMB minutes  
1488 will summarize the actions and deliberations of the DSMB and will be made available at the  
1489 conclusion of the trial. At the time of interim analyses, the DSMB will aid in identifying  
1490 problems surrounding patient accrual and randomization, data collection, and follow-up. At this  
1491 time the DSMB will evaluate safety through a comparison of adverse events across study arms.

1492 The DSMB may recommend that specific groups be withdrawn from the study, if any subgroup  
1493 manifests serious or widespread side effects, or that the trial be terminated altogether. To  
1494 guarantee the unrestricted performance of its task, the DSMB may receive the individual study  
1495 morbidity and mortality data from an unblinded statistician.

#### 1496 **14.6 Study termination**

1497 This study may be terminated by the determination of the US NIH or US Office for Human  
1498 Research Protections (OHRP). In addition, the conduct of this study at an individual site may be  
1499 terminated by the determination of the local IRB.

1500 The study may be terminated in the following situations:

- 1501 • All patients have been accrued and have completed follow-up.
- 1502 • If the interim analysis conducted by the DSMB at midpoint demonstrates a highly  
1503 significant difference in treatment groups, as defined above.

## 1504 15 REFERENCES

- 1505 1. Rubenfeld, G.D., et al., *Incidence and outcomes of acute lung injury*. N Engl J Med, 2005. **353**(16): p.  
1506 1685-93.
- 1507 2. Bernard, G.R., et al., *The American-European Consensus Conference on ARDS. Definitions, mechanisms,*  
1508 *relevant outcomes, and clinical trial coordination*. Am J Respir Crit Care Med, 1994. **149**(3 Pt 1): p. 818-  
1509 24.
- 1510 3. Hudson, L.D., et al., *Clinical risks for development of the acute respiratory distress syndrome*. Am J Respir  
1511 Crit Care Med, 1995. **151**(2 Pt 1): p. 293-301.
- 1512 4. Stapleton, R.D., et al., *Causes and timing of death in patients with ARDS*. Chest, 2005. **128**(2): p. 525-32.
- 1513 5. Erickson, S.E., et al., *Recent trends in acute lung injury mortality: 1996-2005*. Crit Care Med, 2009. **37**(5):  
1514 p. 1574-9.
- 1515 6. Montgomery, A.B., et al., *Causes of mortality in patients with the adult respiratory distress syndrome*. Am  
1516 Rev Respir Dis, 1985. **132**(3): p. 485-9.
- 1517 7. Herridge, M.S. and D.C. Angus, *Acute lung injury--affecting many lives*. N Engl J Med, 2005. **353**(16): p.  
1518 1736-8.
- 1519 8. Davidson, T.A., et al., *Reduced quality of life in survivors of acute respiratory distress syndrome compared*  
1520 *with critically ill control patients*. Jama, 1999. **281**(4): p. 354-60.
- 1521 9. *Ventilation with lower tidal volumes as compared with traditional tidal volumes for acute lung injury and*  
1522 *the acute respiratory distress syndrome. The Acute Respiratory Distress Syndrome Network*. N Engl J Med,  
1523 2000. **342**(18): p. 1301-8.
- 1524 10. Ware, L.B. and M.A. Matthay, *The acute respiratory distress syndrome*. N Engl J Med, 2000. **342**(18): p.  
1525 1334-49.
- 1526 11. Frank, J.A., P.E. Parsons, and M.A. Matthay, *Pathogenetic significance of biological markers of ventilator-*  
1527 *associated lung injury in experimental and clinical studies*. Chest, 2006. **130**(6): p. 1906-14.
- 1528 12. Levitt, J.E., et al., *Analytic review: the pathogenetic and prognostic value of biologic markers in acute lung*  
1529 *injury*. J Intensive Care Med, 2009. **24**(3): p. 151-67.
- 1530 13. Imai, Y., et al., *Injurious mechanical ventilation and end-organ epithelial cell apoptosis and organ*  
1531 *dysfunction in an experimental model of acute respiratory distress syndrome*. Jama, 2003. **289**(16): p.  
1532 2104-12.
- 1533 14. Dhanireddy, S., et al., *Mechanical ventilation induces inflammation, lung injury, and extra-pulmonary*  
1534 *organ dysfunction in experimental pneumonia*. Lab Invest, 2006. **86**(8): p. 790-9.
- 1535 15. Ranieri, V.M., et al., *Effect of mechanical ventilation on inflammatory mediators in patients with acute*  
1536 *respiratory distress syndrome: a randomized controlled trial*. Jama, 1999. **282**(1): p. 54-61.
- 1537 16. Parsons, P.E., et al., *Lower tidal volume ventilation and plasma cytokine markers of inflammation in*  
1538 *patients with acute lung injury*. Crit Care Med, 2005. **33**(1): p. 1-6; discussion 230-2.
- 1539 17. Staras, S.A., et al., *Seroprevalence of cytomegalovirus infection in the United States, 1988-1994*. Clin  
1540 Infect Dis, 2006. **43**(9): p. 1143-51.
- 1541 18. Baltesen, M., M. Messerle, and M.J. Reddehase, *Lungs are a major organ site of cytomegalovirus latency*  
1542 *and recurrence*. J Virol, 1993. **67**(9): p. 5360-6.
- 1543 19. Cook, C.H., et al., *Lipopolysaccharide, tumor necrosis factor alpha, or interleukin-1beta triggers*  
1544 *reactivation of latent cytomegalovirus in immunocompetent mice*. J Virol, 2006. **80**(18): p. 9151-8.
- 1545 20. Limaye, A.P., et al., *Cytomegalovirus reactivation in critically ill immunocompetent patients*. Jama, 2008.  
1546 **300**(4): p. 413-22.
- 1547 21. Fishman, J.A., *Infection in solid-organ transplant recipients*. N Engl J Med, 2007. **357**(25): p. 2601-14.
- 1548 22. Lowance, D., et al., *Valacyclovir for the prevention of cytomegalovirus disease after renal transplantation.*  
1549 *International Valacyclovir Cytomegalovirus Prophylaxis Transplantation Study Group [see comments]*. N  
1550 Engl J Med, 1999. **340**(19): p. 1462-70.
- 1551 23. Sagedal, S., et al., *Impact of early cytomegalovirus infection and disease on long-term recipient and kidney*  
1552 *graft survival*. Kidney Int, 2004. **66**(1): p. 329-37.
- 1553 24. Sagedal, S., et al., *The impact of cytomegalovirus infection and disease on rejection episodes in renal*  
1554 *allograft recipients*. Am J Transplant, 2002. **2**(9): p. 850-6.
- 1555 25. Kalil, A.C., *A silent killer: cytomegalovirus infection in the nonimmunocompromised critically ill patient.*  
1556 Crit Care Med, 2008. **36**(12): p. 3261-4.

- 1557 26. Kutza, A.S., et al., *High incidence of active cytomegalovirus infection among septic patients*. Clin Infect  
1558 Dis, 1998. **26**(5): p. 1076-82.
- 1559 27. Kellum, J.A., et al., *Understanding the inflammatory cytokine response in pneumonia and sepsis: results of  
1560 the Genetic and Inflammatory Markers of Sepsis (GenIMS) Study*. Arch Intern Med, 2007. **167**(15): p.  
1561 1655-63.
- 1562 28. Hamprecht, K., et al., *The Lung as a Central Compartment of Active CMV Infection*. Inflammation  
1563 Research, 2007. **Supplement 2**(Abstract A383): p. S242.
- 1564 29. Stapleton, R.D., *A Phase II Randomized Double-Blind, Placebo-controlled Trial of Fish Oil on Lung and  
1565 Systemic Inflammation in Patients with Acute Lung Injury*. Am J Respir Crit Care Med, 2009. **179**: p.  
1566 A2169.
- 1567 30. Chiche, L., et al., *Active cytomegalovirus infection is common in mechanically ventilated medical intensive  
1568 care unit patients*. Crit Care Med, 2009. **37**(6): p. 1850-7.
- 1569 31. Carlquist, J.F., et al., *Cytomegalovirus induction of interleukin-6 in lung fibroblasts occurs independently  
1570 of active infection and involves a G protein and the transcription factor, NF-kappaB*. J Infect Dis, 1999.  
1571 **179**(5): p. 1094-100.
- 1572 32. Compton, T., et al., *Human cytomegalovirus activates inflammatory cytokine responses via CD14 and Toll-  
1573 like receptor 2*. J Virol, 2003. **77**(8): p. 4588-96.
- 1574 33. Murayama, T., et al., *Human cytomegalovirus induces interleukin-8 production by a human monocytic cell  
1575 line, THP-1, through acting concurrently on AP-1- and NF-kappaB-binding sites of the interleukin-8 gene*.  
1576 J Virol, 1997. **71**(7): p. 5692-5.
- 1577 34. Craigen, J.L., et al., *Human cytomegalovirus infection up-regulates interleukin-8 gene expression and  
1578 stimulates neutrophil transendothelial migration*. Immunology, 1997. **92**(1): p. 138-45.
- 1579 35. Iwamoto, G.K. and S.A. Konicek, *Cytomegalovirus immediate early genes upregulate interleukin-6 gene  
1580 expression*. J Investig Med, 1997. **45**(4): p. 175-82.
- 1581 36. Tong, C.Y., et al., *Association of tumour necrosis factor alpha and interleukin 6 levels with  
1582 cytomegalovirus DNA detection and disease after renal transplantation*. J Med Virol, 2001. **64**(1): p. 29-  
1583 34.
- 1584 37. Humar, A., et al., *Elevated serum cytokines are associated with cytomegalovirus infection and disease in  
1585 bone marrow transplant recipients*. J Infect Dis, 1999. **179**(2): p. 484-8.
- 1586 38. Humbert, M., et al., *In situ production of interleukin-6 within human lung allografts displaying rejection or  
1587 cytomegalovirus pneumonia*. Transplantation, 1993. **56**(3): p. 623-7.
- 1588 39. Humbert, M., et al., *Activation of macrophages and cytotoxic cells during cytomegalovirus pneumonia  
1589 complicating lung transplantations*. Am Rev Respir Dis, 1992. **145**(5): p. 1178-84.
- 1590 40. Cook, C.H., et al., *Intra-abdominal bacterial infection reactivates latent pulmonary cytomegalovirus in  
1591 immunocompetent mice*. J Infect Dis, 2002. **185**(10): p. 1395-400.
- 1592 41. Cook, C.H., et al., *Pulmonary cytomegalovirus reactivation causes pathology in immunocompetent mice*.  
1593 Crit Care Med, 2006. **34**(3): p. 842-9.
- 1594 42. Papazian, L., et al., *A contributive result of open-lung biopsy improves survival in acute respiratory  
1595 distress syndrome patients*. Crit Care Med, 2007. **35**(3): p. 755-62.
- 1596 43. Puius, Y.A. and D.R. Snyderman, *Prophylaxis and treatment of cytomegalovirus disease in recipients of  
1597 solid organ transplants: current approach and future challenges*. Curr Opin Infect Dis, 2007. **20**(4): p. 419-  
1598 24.
- 1599 44. Kimberlin, D.W., et al., *Effect of ganciclovir therapy on hearing in symptomatic congenital  
1600 cytomegalovirus disease involving the central nervous system: a randomized, controlled trial*. J Pediatr,  
1601 2003. **143**(1): p. 16-25.
- 1602 45. Wiltshire, H., et al., *Pharmacokinetic profile of ganciclovir after its oral administration and from its  
1603 prodrug, valganciclovir, in solid organ transplant recipients*. Clin Pharmacokinet, 2005. **44**(5): p. 495-507.
- 1604 46. Einsele, H., et al., *Oral valganciclovir leads to higher exposure to ganciclovir than intravenous ganciclovir  
1605 in patients following allogeneic stem cell transplantation*. Blood, 2006. **107**(7): p. 3002-8.
- 1606 47. Lim, Z.Y., et al., *Results of a phase I/II British Society of Bone Marrow Transplantation study on PCR-  
1607 based pre-emptive therapy with valganciclovir or ganciclovir for active CMV infection following  
1608 alemtuzumab-based reduced intensity allogeneic stem cell transplantation*. Leuk Res, 2009. **33**(2): p. 244-  
1609 9.
- 1610 48. Kimberlin, D.W., et al., *Pharmacokinetic and pharmacodynamic assessment of oral valganciclovir in the  
1611 treatment of symptomatic congenital cytomegalovirus disease*. J Infect Dis, 2008. **197**(6): p. 836-45.

- 1612 49. Paya, C., et al., *Efficacy and safety of valganciclovir vs. oral ganciclovir for prevention of cytomegalovirus*  
1613 *disease in solid organ transplant recipients*. Am J Transplant, 2004. **4**(4): p. 611-20.
- 1614 50. Asberg, A., et al., *Oral valganciclovir is noninferior to intravenous ganciclovir for the treatment of*  
1615 *cytomegalovirus disease in solid organ transplant recipients*. Am J Transplant, 2007. **7**(9): p. 2106-13.
- 1616 51. Preiksaitis, J.K., et al., *Canadian society of transplantation consensus workshop on cytomegalovirus*  
1617 *management in solid organ transplantation final report*. Am J Transplant, 2005. **5**(2): p. 218-27.
- 1618 52. Boeckh, M., et al., *Cytomegalovirus in hematopoietic stem cell transplant recipients: Current status, known*  
1619 *challenges, and future strategies*. Biol Blood Marrow Transplant, 2003. **9**(9): p. 543-58.
- 1620 53. Goodrich, J.M., et al., *Early treatment with ganciclovir to prevent cytomegalovirus disease after allogeneic*  
1621 *bone marrow transplantation*. New England Journal of Medicine, 1991. **325**(23): p. 1601-7.
- 1622 54. Goodrich, J.M., et al., *Ganciclovir prophylaxis to prevent cytomegalovirus disease after allogeneic marrow*  
1623 *transplant*. Annals of Internal Medicine, 1993. **118**(3): p. 173-8.
- 1624 55. Reusser, P., et al., *Randomized multicenter trial of foscarnet versus ganciclovir for preemptive therapy of*  
1625 *cytomegalovirus infection after allogeneic stem cell transplantation*. Blood, 2002. **99**(4): p. 1159-64.
- 1626 56. Gane, E., et al., *Randomised trial of efficacy and safety of oral ganciclovir in the prevention of*  
1627 *cytomegalovirus disease in liver-transplant recipients*. The Oral Ganciclovir International Transplantation  
1628 *Study Group [corrected]*. Lancet, 1997. **350**(9093): p. 1729-33.
- 1629 57. Winston, D.J., et al., *Ganciclovir prophylaxis of cytomegalovirus infection and disease in allogeneic bone*  
1630 *marrow transplant recipients. Results of a placebo-controlled, double-blind trial*. Annals of Internal  
1631 *Medicine*, 1993. **118**(3): p. 179-84.
- 1632 58. Salzberger, B., et al., *Foscarnet and ganciclovir combination therapy for CMV disease in HIV-infected*  
1633 *patients*. Infection, 1994. **22**(3): p. 197-200.
- 1634 59. Boeckh, M., D. Myerson, and R.A. Bowden, *Early detection and treatment of cytomegalovirus infections in*  
1635 *marrow transplant patients: methodological aspects and implications for therapeutic interventions*. Bone  
1636 *Marrow Transplantation*, 1994. **14**(Suppl 4): p. S66-70.
- 1637 60. Boeckh, M., et al., *Cytomegalovirus pp65 antigenemia-guided early treatment with ganciclovir versus*  
1638 *ganciclovir at engraftment after allogeneic marrow transplantation: a randomized double-blind study*.  
1639 *Blood*, 1996. **88**(10): p. 4063-71.
- 1640 61. Boeckh, M., et al. *Prevention of Late CMV Disease after HCT: A Randomized Double-Blind Multicenter*  
1641 *Trial of Valganciclovir (VGCV) Prophylaxis versus PCR-Guided GCV-VGCV Preemptive Therapy*. in  
1642 *Annual Meeting of the American Society for Blood and Marrow Transplantation*. 2008. San Diego, CA.
- 1643 62. Merigan, T.C., et al., *A controlled trial of ganciclovir to prevent cytomegalovirus disease after heart*  
1644 *transplantation*. N Engl J Med, 1992. **326**(18): p. 1182-6.
- 1645 63. Spector, S.A., et al., *Oral ganciclovir for the prevention of cytomegalovirus disease in persons with AIDS*.  
1646 *Roche Cooperative Oral Ganciclovir Study Group*. New England Journal of Medicine, 1996. **334**(23): p.  
1647 1491-7.
- 1648 64. von Muller, L., et al., *Active cytomegalovirus infection in patients with septic shock*. Emerg Infect Dis,  
1649 2006. **12**(10): p. 1517-22.
- 1650 65. von Muller, L., et al., *Cellular immunity and active human cytomegalovirus infection in patients with septic*  
1651 *shock*. J Infect Dis, 2007. **196**(9): p. 1288-95.
- 1652 66. Bucher, H.C., et al., *Users' guides to the medical literature: XIX. Applying clinical trial results. A. How to*  
1653 *use an article measuring the effect of an intervention on surrogate end points*. Evidence-Based Medicine  
1654 *Working Group*. Jama, 1999. **282**(8): p. 771-8.
- 1655 67. Rubenfeld, G.D. and E. Abraham, *When is a negative phase II trial truly negative?* Am J Respir Crit Care  
1656 *Med*, 2008. **178**(6): p. 554-5.
- 1657 68. Meduri, G.U., et al., *Persistent elevation of inflammatory cytokines predicts a poor outcome in ARDS*.  
1658 *Plasma IL-1 beta and IL-6 levels are consistent and efficient predictors of outcome over time*. Chest, 1995.  
1659 **107**(4): p. 1062-73.
- 1660 69. Mercat, A., et al., *Positive end-expiratory pressure setting in adults with acute lung injury and acute*  
1661 *respiratory distress syndrome: a randomized controlled trial*. Jama, 2008. **299**(6): p. 646-55.
- 1662 70. Willson, D.F., et al., *Effect of exogenous surfactant (calfactant) in pediatric acute lung injury: a*  
1663 *randomized controlled trial*. Jama, 2005. **293**(4): p. 470-6.
- 1664 71. Ljungman, P., P. Griffiths, and C. Paya, *Definitions of cytomegalovirus infection and disease in transplant*  
1665 *recipients*. Clin Infect Dis, 2002. **34**(8): p. 1094-7.
- 1666 72. Brower, R.G., et al., *Higher versus lower positive end-expiratory pressures in patients with the acute*  
1667 *respiratory distress syndrome*. N Engl J Med, 2004. **351**(4): p. 327-36.

- 1668 73. Davidian, M., A.A. Tsiatis, and S. Leon, *Semiparametric Estimation of Treatment Effect in a Pretest-*  
1669 *Posttest Study with Missing Data*. Stat Sci, 2005. **20**(3): p. 261-301.
- 1670 74. Shepherd, B.E., *Does Finasteride Affect the Severity of Prostate Cancer? A Causal Sensitivity Analysis*.  
1671 Journal of the American Statistical Association, 2009. **484**: p. 1392-1404.
- 1672 75. DeMets, D.L. and K.K. Lan, *Interim analysis: the alpha spending function approach*. Stat Med, 1994.  
1673 **13**(13-14): p. 1341-52; discussion 1353-6.
- 1674 76. Finkelstein, D.M., and Schoenfeld, D.A., *Combining Mortality and Longitudinal Measures in Clinical*  
1675 *Trials*. Stat Med, 1999, 18: 1341-1354.
- 1676 77. Hayden, D, Pauler, D. K. and Schoenfeld, D., *An Estimator for Treatment Comparisons among Survivors*  
1677 *in Randomized Trials*. Biometrics, 2005, 61:305-310.
- 1678
- 1679

1680 **16 INVESTIGATORS STATEMENT/PROTOCOL SIGNATURE PAGE**

1681 I have read and understood the contents of this protocol and all study documents, and agree to carry out  
1682 all of its terms in accordance with Good Clinical Practice.

1683  
1684 I agree to permit trial related monitoring, audits, Institutional Review Board review and regulatory agency  
1685 inspection of study-related documents and procedures, and to provide for direct access to all study-related  
1686 source data and documents.

1687  
1688 I agree that all the test article(s) supplied by Genentech, a member of the Roche Group will be used solely  
1689 for the purpose of conducting this study.

1690  
1691  
1692 \_\_\_\_\_  
1693 Principal Investigator (printed name)

1694  
1695  
1696 \_\_\_\_\_  
1697 Principal Investigator (Signature) Date

1698  
1699  
1700  
1701  
1702 This protocol version 3.4.1 has been approved by the Protocol Leadership Team. The following  
1703 signatures document this approval.

1704  
1705  
1706  
1707 \_\_\_\_\_  
1708 Signature Date

1709 Michael Boeckh, MD  
1710 Vaccine and Infectious Disease Division, Fred Hutchinson Cancer Research Center, Seattle, WA

1711  
1712  
1713 \_\_\_\_\_  
1714 Signature Date

1715 Ajit Limaye, MD  
1716 Dept. of Laboratory Medicine, Univ. of Washington, Seattle, WA

1717  
1718  
1719 \_\_\_\_\_  
1720 Signature Date

1721 Gordon Rubinfeld, MD, MSc  
1722 Sunnybrook Medical Centre, Univ. of Toronto, Toronto, Canada



APPENDIX A: TIME AND EVENTS SCHEDULE

| Visit                                          | Screening <sup>a</sup>                                                                                                                                                                      | 01 <sup>b</sup> | 02         | 03              | 04         | 05         | 06         | 07 <sup>c</sup>           | 08         | 09 <sup>e</sup> | 10         | 11         | 12          | Assay Location |
|------------------------------------------------|---------------------------------------------------------------------------------------------------------------------------------------------------------------------------------------------|-----------------|------------|-----------------|------------|------------|------------|---------------------------|------------|-----------------|------------|------------|-------------|----------------|
| Day                                            | -4 to 1                                                                                                                                                                                     | 1               | 4          | 7               | 11         | 14         | 18         | 21                        | 25         | 28              | 35         | 60         | 180         |                |
| Window (+/- days)                              | 0                                                                                                                                                                                           | (+/-)<br>1      | (+/-)<br>1 | (+/-)<br>)<br>1 | (+/-)<br>1 | (+/-)<br>1 | (+/-)<br>1 | (+/-)<br>1                | (+/-)<br>1 | (+/-)<br>1      | (+/-)<br>1 | (+/-)<br>3 | (+/-)<br>14 |                |
| Informed consent                               | X                                                                                                                                                                                           | -               | -          | -               | -          | -          | -          | -                         | -          | -               | -          | -          | -           |                |
| Administer Study Drug                          | Note: Patient receives 5 days of ganciclovir intravenously TWICE daily, then up to 23 days of ganciclovir ONCE daily intravenously (or matching placebo) in patients that are hospitalized. |                 |            |                 |            |            |            |                           |            |                 |            |            |             |                |
| <b>Blood collection (ml) vol. estimated:</b>   |                                                                                                                                                                                             |                 |            |                 |            |            |            |                           |            |                 |            |            |             |                |
| Pregnancy <sup>c</sup>                         | 3                                                                                                                                                                                           |                 |            |                 |            |            |            | -----3 <sup>c</sup> ----- |            |                 |            |            |             | L              |
| CMV Serology                                   | 3                                                                                                                                                                                           | -               | -          | -               | -          | -          | -          | -                         | -          | -               | -          | -          | -           | L/A            |
| Genomic analysis                               | -                                                                                                                                                                                           | 15              | -          | -               | 15         | -          | -          | -                         | -          | -               | -          | -          | -           | S              |
| Creatinine / T. Bilirubin                      | 1                                                                                                                                                                                           | 1               | 1          | 1               | 1          | 1          | 1          | 1                         | 1          | 1               | 1          | -          | -           | L/S            |
| Cytokine                                       | -                                                                                                                                                                                           | 5               | 5          | 5               | 5          | 5          | 5          | 5                         | 5          | 5               | 5          | -          | -           | S              |
| CMV PCR                                        | -                                                                                                                                                                                           | 5               | 5          | 5               | 5          | 5          | 5          | 5                         | 5          | 5               | 5          | -          | -           | S              |
| CBC, w/differential, platelets                 | 1                                                                                                                                                                                           | 3               | 3          | 3               | 3          | 3          | 3          | 3                         | 3          | 3               | 3          | -          | -           | L/S            |
| <b>Estimated blood volume</b>                  | 8                                                                                                                                                                                           | 29              | 14         | 14              | 29         | 14         | 14         | 14                        | 14         | 14              | 14         | 0          | 0           | Sum: 178       |
| <b>Endotracheal (ETT) aspirate<sup>d</sup></b> |                                                                                                                                                                                             | X <sup>d</sup>  |            |                 |            |            |            |                           |            |                 |            |            |             |                |
| CMV PCR                                        | -                                                                                                                                                                                           | X               | -          | X               |            | -          | -          | -                         | -          | -               | -          | -          | -           | S              |
| Cytokine                                       | -                                                                                                                                                                                           | X               | -          | X               |            | -          | -          | -                         | -          | -               | -          | -          | -           | S              |
| <b>Throat swab:</b>                            |                                                                                                                                                                                             |                 |            |                 |            |            |            |                           |            |                 |            |            |             |                |
| CMV PCR                                        | -                                                                                                                                                                                           | X               | X          | X               | X          | X          | X          | X                         | X          | X               | X          | -          | -           | S              |
| <b>Clinical Assessments:</b>                   |                                                                                                                                                                                             |                 |            |                 |            |            |            |                           |            |                 |            |            |             |                |
| Survey                                         |                                                                                                                                                                                             | X               |            |                 |            |            |            |                           |            |                 |            |            | X           |                |
| Vital status                                   | -                                                                                                                                                                                           |                 |            |                 |            |            |            |                           |            |                 |            | X          | X           |                |

L = local test; S=Seattle, WA; A= ARUP in Utah

<sup>a</sup> Screening must occur during 1<sup>st</sup> 120 hours of admission to acute care hospital.

<sup>b</sup> Prior to administration of study drug.

<sup>c</sup> A urine pregnancy test is also acceptable. A follow up pregnancy test will be performed at the time of hospital discharge.

<sup>d</sup> Can only be performed while patients are intubated. \*ETT Aspiration – If intubated, perform at Day 1 (± 1 day) and every fourth day (± 2 days) on Day 1, 5, 9, 13, 17, 21, 25, and 29.

<sup>e</sup> All patients must have Day 21 & 28 visits. Day 35 visit will only occur in patients when drug is stopped between Days 25-28.

---

**APPENDIX B: NCI COMMON TOXICITY CRITERIA (CTC)**

1731  
1732

1733 A. **The NCI CTC criteria will be used for Adverse Event reporting. The NCI CTC criteria can be**  
1734 **downloaded from the following WEB site: [http://evs.nci.nih.gov/ftp1/CTCAE/CTCAE\\_4.03\\_2010-](http://evs.nci.nih.gov/ftp1/CTCAE/CTCAE_4.03_2010-)**  
1735 **06-14\_QuickReference\_5x7.pdf. A hard copy of the NCI CTC can be found in the study reference**  
1736 **manual.**

1737

1738 B. **For this study the CTC guideline categories have been assigned numbers as follows;**

| 1739 | <b>CATEGORY</b>               | <b>CODE</b> |
|------|-------------------------------|-------------|
| 1740 | ALLERGY/IMMUNOLOGY            | 01          |
| 1741 | AUDITORY/HEARING              | 02          |
| 1742 | BLOOD/BONE MARROW             | 03          |
| 1743 | CARDIOVASCULAR (ARRHYTHMIA)   | 04          |
| 1744 | CARDIOVASCULAR (GENERAL)      | 05          |
| 1745 | COAGULATION                   | 06          |
| 1746 | CONSTITUTIONAL SYMPTOMS       | 07          |
| 1747 | DERMATOLOGY                   | 08          |
| 1748 | ENDOCRINE                     | 09          |
| 1749 | GASTROINTESTINAL              | 10          |
| 1750 | HEMORRHAGE                    | 11          |
| 1751 | HEPATIC                       | 12          |
| 1752 | INFECTION/FEBRILE NEUTROPENIA | 13          |
| 1753 | LYMPHATICS                    | 14          |
| 1754 | METABOLIC/LABORATORY          | 15          |
| 1755 | MUSCULOSKELETAL               | 16          |
| 1756 | NEUROLOGY                     | 17          |
| 1757 | OCULAR/VISUAL                 | 18          |
| 1758 | PAIN                          | 19          |
| 1759 | PULMONARY                     | 20          |
| 1760 | RENAL/GENITOURINARY           | 21          |
| 1761 | SECONDARY MALIGNANCY          | 22          |
| 1762 | SEXUAL/REPRODUCTIVE FUNCTION  | 23          |
| 1763 | SYNDROMES 24                  |             |

1764 **APPENDIX C: COMMONLY PRESCRIBED IMMUNOSUPPRESSIVE AGENTS**

1765

1766

| Generic Name | Trade Name |
|--------------|------------|
| Abatacept    | Orencia    |
| Adalimumab   | Humira     |
| Etanercept   | Enbrel     |
| Golimumab    | Simponi    |
| Infliximab   | Remicaide  |
| Tocilizumab  | Actemra    |

1767

1768

| Generic Name                    | Trade Name              |
|---------------------------------|-------------------------|
| Antithymocyte Globulin (Equine) | ATG, ATGAM              |
| Antithymocyte Globulin (Rabbit) | Thymoglobulin           |
| Azathioprine                    | Imuran                  |
| Anakinra                        | Kineret                 |
| Basiliximab                     | Simulect                |
| Cyclophosphamide                | Cytosan                 |
| Cyclosporine                    | Neoral, Sandimmune      |
| Daclizumab                      | Zenapax                 |
| Everolimus                      | Afinitor                |
| Methotrexate                    | Rheumatrex, Trexall     |
| Mycophenolate                   | Cellcept, MMF, Myfortic |
| Sirolimus                       | Rapamune                |
| Tacrolimus                      | Prograf                 |

1769

1770

| Generic Name | Trade Name |
|--------------|------------|
| Alemtuzumab  | Campath    |
| Entercept    | Enbrel     |
| Infliximab   | Remicade   |
| Natalizumab  | Tysabri    |
| Rituximab    | Rituxan    |

1771

1772

**APPENDIX D: LUNG PROTECTIVE VENTILATION PROTOCOL RECOMMENDATIONS**

*Note: The following are guidelines that are recommended for applicable ARDS/ALI patients. However, each study site should use their own best judgment, and consult with the coordinating center if there are any questions.*

**Ventilator Management**

A modified, simplified version of the ARDS Network lung protective lower tidal volume strategy will be used in this trial. This strategy, which was associated with low mortality rates in three previous ARDS Network trials (ARMA, ALVEOLI, and FACTT), will ensure that study subjects receive the beneficial effects of lung protection while participating in this trial [72, 75]. ARDS Network personnel have substantial experience in the application of this protocol from the three completed trials noted above.

1. Any mode of ventilation capable of delivering the prescribed tidal volume ( $V_T$ , 6ml/kg predicted body weight, +/- 2ml/kg) may be used, provided the  $V_T$  target is monitored and adjusted appropriately. If airway pressure release ventilation (APRV) is used, tidal volume is defined as the sum of the volume that results from the ventilator pressure-release and an estimation of the average spontaneous  $V_T$ . In the spirit of providing lung protective ventilation, high frequency oscillatory ventilation will also be allowed in this trial.
2.  $V_T$  Goal: 6 ml / kg predicted body weight.
3. Predicted body weight (PBW) is calculated from age, gender, and height (heel to crown) according to the following equations:
  - a. Males:  $PBW (kg) = 50 + 2.3 [height (inches) - 60]$
  - b. Females:  $PBW (kg) = 45.5 + 2.3 [height (inches) - 60]$
4. Measure and record inspiratory plateau pressure (Pplat) according to ICU routine (at least every four hours and after changes in  $V_T$  and PEEP recommended)
5. If  $Pplat > 30$  cm  $H_2O$ , reduce  $V_T$  to 5 ml / kg and then to 4 ml / kg PBW if necessary to decrease Pplat to  $\leq 30$  cm  $H_2O$ .
6. If  $V_T < 6$  ml/kg PBW and  $Pplat < 25$  cm  $H_2O$ , raise  $V_T$  by 1 ml / kg PBW to a maximum of 6 ml/kg.
7. If "severe dyspnea" (more than 3 double breaths per minute on volume-cycled ventilator or airway pressure remains at or below PEEP level during inspiration), then raise  $V_T$  to 7 or 8 ml/kg PBW if Pplat remains below 30 cm  $H_2O$ . If Pplat exceeds 30 cm  $H_2O$  with  $V_T$  of 7 or 8 ml/kg PBW, then revert to lower  $V_T$  and consider more sedation.
8. If  $pH < 7.15$ ,  $V_T$  may be raised and Pplat limit suspended (not required).
9. Oxygenation target: 55 mm Hg  $< PaO_2 < 80$  mm Hg or 88%  $< SpO_2 < 95\%$ . When both  $PaO_2$  and  $SpO_2$  are available simultaneously, the  $PaO_2$  criterion will take precedence.
10. Minimum PEEP = 5 cm  $H_2O$
11. Adjust  $F_{I}O_2$  or PEEP upward within 5 minutes if there are consistent measurements below the oxygenation target range
12. Adjust  $F_{I}O_2$  or PEEP downward within 30 minutes if there are consistent measurements above the oxygenation target range.
13. There are no requirements for maintaining a specific PEEP to  $F_{I}O_2$  ratio. The lower PEEP/higher  $F_{I}O_2$  table represents a consensus approach developed by ARDS Network investigators in 1995. The higher PEEP/lower  $F_{I}O_2$  table (ALVEOLI) yielded equivalent results in a randomized trial [72] and would be acceptable and perhaps preferable in patients who appear to respond with a substantial increase in arterial oxygenation in the transition from lower to higher PEEP.

**Lower PEEP/Higher  $F_{I}O_2$  Treatment Group**

|                     |            |     |     |     |     |     |     |     |     |     |     |     |     |     |       |
|---------------------|------------|-----|-----|-----|-----|-----|-----|-----|-----|-----|-----|-----|-----|-----|-------|
| <b>Higher PEEP/</b> | $F_{I}O_2$ | .30 | .40 | .40 | .50 | .50 | .60 | .70 | .70 | .70 | .80 | .90 | .90 | .90 | 1.0   |
|                     | PEEP       | 5   | 5   | 8   | 8   | 10  | 10  | 10  | 12  | 14  | 14  | 14  | 16  | 18  | 18-24 |

**Lower  $F_{I}O_2$  Study Group**

|                   |            |     |     |     |     |     |     |     |     |     |           |     |     |     |     |
|-------------------|------------|-----|-----|-----|-----|-----|-----|-----|-----|-----|-----------|-----|-----|-----|-----|
| Note<br>:<br>Leve | $F_{I}O_2$ | .30 | .30 | .30 | .30 | .30 | .40 | .40 | .50 | .50 | .50 – .80 | .80 | .90 | 1.0 | 1.0 |
|                   | PEEP       | 5   | 8   | 10  | 12  | 14  | 14  | 16  | 16  | 18  | 20        | 22  | 22  | 22  | 24  |

Is of PEEP in these  $F_{I}O_2$ / PEEP tables represent levels set on the ventilator, not levels of total-PEEP, auto-PEEP, or intrinsic-PEEP.

14. No specific rules for respiratory rate. It is recommended that the respiratory rate be increased in increments to a maximum set rate of 35 if  $pH < 7.30$ .

- 1834 15. No specific rules about I:E. It is recommended that duration of Inspiration be  $\leq$  duration of Expiration.  
 1835 16. Bicarbonate is allowed (neither encouraged nor discouraged) if  $\text{pH} < 7.30$ .  
 1836 17. Changes in more than one ventilator setting driven by measurements of  $\text{PaO}_2$ ,  $\text{pH}$ , and  $\text{Pplat}$  may be performed  
 1837 simultaneously, if necessary.  
 1838

## 1839 D.2. Weaning

1840 *Note: Commencement of Weaning is occurring at the clinician's discretion.*  
 1841  
 1842

1843 Commencement of Weaning (applicable to patients ventilated invasively or non-invasively)  
 1844

1845 Patients will be assessed for the following weaning readiness criteria each day between 0600 and 1000. If a patient procedure,  
 1846 test, or other extenuating circumstance prevents assessment for these criteria between 0600 and 1000, then the assessment and  
 1847 initiation of subsequent weaning procedures may be delayed for up to six hours.  
 1848

- 1849 1. At least 12 hours since enrollment in the trial
- 1850 2.  $\text{F}_1\text{O}_2 \leq 0.40$  and  $\text{PEEP} \leq 8$  cm  $\text{H}_2\text{O}$  or  $\text{F}_1\text{O}_2 \leq 0.50$  and  $\text{PEEP} = 5$  cm  $\text{H}_2\text{O}$
- 1851 3. Values of both  $\text{PEEP}$  and  $\text{F}_1\text{O}_2 \leq$  values from previous day (comparing Reference Measurement values, section 6.3)
- 1852 4. Not receiving neuromuscular blocking agents and without neuromuscular blockade
- 1853 5. Patient exhibiting inspiratory efforts. If no efforts are evident at baseline, ventilator set rate will be decreased to  
 1854 50% of baseline level for up to 5 minutes to detect inspiratory efforts.
- 1855 6. Systolic arterial pressure  $\geq 90$  mm Hg without vasopressor support ( $\leq 5$  mcg/kg/min dopamine or dobutamine will  
 1856 not be considered a vasopressor)  
 1857

## 1858 Spontaneous Breathing Trial Procedure and Assessment for Unassisted Breathing

1859  
 1860 If criteria 1-6 above are met, then initiate a trial of up to 120 minutes of spontaneous breathing with  $\text{F}_1\text{O}_2 < 0.5$  using any  
 1861 of the following approaches:

- 1862 1. Pressure support (PS)  $< 5$  cm  $\text{H}_2\text{O}$ ,  $\text{PEEP} < 5$  cm  $\text{H}_2\text{O}$
- 1863 2. CPAP  $< 5$  cm  $\text{H}_2\text{O}$
- 1864 3. T-piece
- 1865 4. Tracheostomy mask  
 1866

1867 The clinical team may decide to change mode during spontaneous breathing (PS = 5, CPAP, tracheostomy mask, or T-  
 1868 piece) at any time during the spontaneous breathing trial.  
 1869

1870 Monitor for tolerance using the following:

- 1871 1.  $\text{SpO}_2 \geq 90\%$  and / or  $\text{PaO}_2 \geq 60$  mm Hg
- 1872 2. Mean spontaneous tidal volume  $\geq 4$  ml/kg PBW (if measured)
- 1873 3. Respiratory Rate  $\leq 35$  / min
- 1874 4.  $\text{pH} \geq 7.30$  (if measured)
- 1875 5. No respiratory distress (defined as 2 or more of the following):  
 1876 a. Heart rate  $\geq 120\%$  of the 0600 rate ( $\leq 5$  min at  $> 120\%$  may be tolerated)  
 1877 b. Marked use of accessory muscles  
 1878 c. Abdominal paradox  
 1879 d. Diaphoresis  
 1880 e. Marked subjective dyspnea  
 1881

1882 If any of the goals a-e are not met, revert to previous ventilator settings or to PS greater than or equal to 10 cm  $\text{H}_2\text{O}$  with  
 1883 Positive End-expiratory Pressure and  $\text{F}_1\text{O}_2 =$  previous settings and reassess for weaning the next morning. The patient will  
 1884 be reassessed for weaning (Section E2) the following day.  
 1885

1886 Decision to remove ventilator support:

1887 If tolerance criteria for spontaneous breathing trial (a-e above) are met for at least 30 minutes, the clinical team may  
 1888 decide to discontinue mechanical ventilation. However, the spontaneous breathing trial can continue for up to 120  
 1889 minutes if tolerance remains in question.  
 1890

## 1891 D.3. Definition of Unassisted Breathing

- 1892 1. Spontaneously breathing with face mask, nasal prong oxygen, or room air, OR
- 1893 2. T-tube breathing, OR
- 1894 3. Tracheostomy mask breathing, OR

- 
- 1895 4. CPAP  $\leq$  5 without PS or IMV assistance
  - 1896 5. Use of CPAP or BIPAP solely for sleep apnea management
  - 1897

**D.4. Definition of Extubation**

- 1899 1. Removal of an oral or nasotracheal tube
- 1900 2. If a patient receives a tracheostomy, the time of extubation is defined as the time when the patient achieves unassisted
- 1901 breathing as defined in section E.3

**D.5. Completion of Ventilator Procedures**

1902 Patients will be considered to have completed the study ventilator procedures if any of the following conditions occur:

- 1903
- 1904
- 1905
- 1906 1. Death
- 1907 2. Hospital discharge
- 1908 3. Alive 28 days after enrollment
- 1909

1910 If a patient requires positive pressure ventilation after a period of unassisted breathing, the study ventilator procedures will

1911 resume unless the patient was discharged from the hospital or > 28 days elapsed since enrollment.

1912

**D.6. Removal from the Ventilator Management Protocol**

1913 Patients may be removed from the 6 ml/kg PBW tidal volume ventilation requirement if they develop neurologic

1914 conditions where hypercapnia would be contraindicated (e.g., intracranial bleeding, GCS < 8, cerebral edema, mass effect

1915 [midline shift on CT scan], papilledema, intracranial pressure monitoring, fixed pupils).

1916

1917

1918

1919

1920

1921

**APPENDIX E: CONSERVATIVE FLUID MANAGEMENT**

*Note: The following are guidelines that are recommended for applicable ARDS/ALI patients. However, each study site should use their own best judgment, and consult with the coordinating center if there are any questions.*

This fluid protocol captures the primary positive outcome of the FACTT trial on increasing ventilator free days. This protocol should be initiated within four hours of randomization in enrolled patients, and continued until UAB or study day 7, whichever occurs first.

1. Discontinue maintenance fluids.
2. Continue medications and nutrition.
3. Manage electrolytes and blood products per usual practice.
4. For shock, use any combination of fluid boluses<sup>#</sup> and vasopressor(s) to achieve MAP ≥ 60 mmHg as fast as possible. Wean vasopressors as quickly as tolerated beginning four hours after blood pressure has stabilized.
5. Withhold diuretic therapy in renal failure § and until 12 hours after last fluid bolus or vasopressor given.

| CVP<br>(recommended) | PAOP<br>(optional) | MAP ≥ 60 mm Hg AND off vasopressors for ≥ 12 hours          |                                        |
|----------------------|--------------------|-------------------------------------------------------------|----------------------------------------|
|                      |                    | Average urine output < 0.5 ml/kg/hr                         | Average urine output ≥ 0.5 ml/kh hr    |
| >8                   | > 12               | Furosemide*<br>Reassess in 1 hour                           | Furosemide*<br>Reassess in 4 hours     |
| 4-8                  | 8-12               | Give fluid bolus as fast as possible*<br>Reassess in 1 hour | No intervention<br>Reassess in 4 hours |
| < 4                  | < 8                |                                                             |                                        |

§ Renal failure is defined as dialysis dependence, oliguria with serum creatinine > 3mg/dl, or oliguria with serum creatinine 0-3 with urinary indices indicative of acute renal failure.

<sup>#</sup> Recommended fluid bolus = 15 mL / kg crystalloid (round to nearest 250 mL) or 1 Unit packed red cells or 25 grams albumin

\*Recommended Furosemide dosing = begin with 20 mg bolus or 3 mg/hr infusion or last known effective dose. Double each subsequent dose until goal achieved (oliguria reversal or intravascular pressure target) or maximum infusion rate of 24 mg or 160 mg bolus reached. Do not exceed 620 mg/day. Also, if patient has heart failure, consider treatment with dobutamine.

NIH ARDS Network  
Revision date: March 9, 2009

---

**APPENDIX F: DATA AND SAFETY MONITORING PLAN**

The purpose of this plan is to describe the oversight and monitoring of the study which is conducted to ensure the safety of study participants and the integrity of data collected as part of the study.

Safety monitoring is carried out by the coordinating center Principal Investigator, site Principal Investigators, an independent safety monitor and an independent Data Safety Monitoring Board.

## 1. Safety Monitoring

### 1.1. Monitoring for Safety by Study Sites

Investigators are responsible for monitoring the safety of patients who have entered this study. While hospitalized, subjects will be assessed for adverse events by the research nurse/coordinator and principal investigator or co-investigator(s).

The investigator is responsible for appropriate medical care of patients during the study. The investigator remains responsible to follow, through appropriate health care options, adverse events (AEs) that are serious, cause the patient to discontinue before completing the study, or are ongoing at the time of study completion. The investigator will maintain responsibility for forwarding SAEs to the coordinating site and their institutional review board.

### 1.2. Monitoring of Safety by an Independent Study Monitor

Study data and regulatory aspects at study sites will be monitored by a study monitor. The study monitor will:

1. Conduct a site initiation visit
2. Perform monitoring visits during the trial
3. Conduct a close-out visit (Note: in selected circumstances [e.g. if there is insufficient enrollment], a site maybe closed out administratively without a visit).

Overall, we expect approximately 4 monitoring visits per site, including a start-up visit, one visit after approximately 2-3 patients have been enrolled, one visit at approximately 50% of enrollment and one final close-out visit.

Study monitoring will consist of:

1. Monitoring of the consent forms, inclusion/exclusion criteria, hematologic safety labs (i.e. neutrophil counts, platelet counts), length-of-stay endpoints, ventilation data and SAEs (100%)
2. Every 5<sup>th</sup> patients will be monitored 100%.
3. Monitoring of the regulatory binder (at each visit)
4. Monitoring of the investigational drug pharmacy (each visit).

### 1.3. Organization and Interactions of Parties Involved in Data and Safety Monitoring

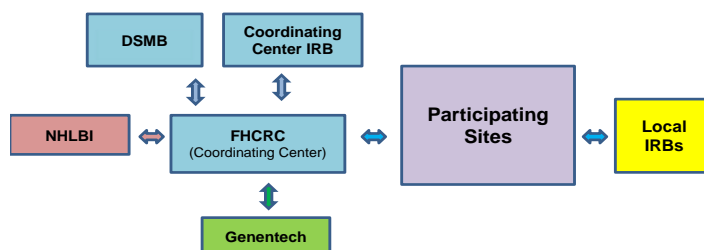

The diagram above illustrates the relationship between the study sites and the coordinating site as well as other entities in this study. Communication with the DSMB will be primarily through the coordinating site in Seattle.



#### 1.4. Responsibilities of the DSMB

Data safety monitoring will be performed by the DSMB assembled by the coordinating site and in consultation with NIH NHLBI. This protocol and all SAEs will be forwarded to the DSMB for review. Details of the operating guidelines for the DSMB are summarized in the DSMB charter. Briefly, this DSMB will assess the effects of the study drug during the trial and may give advice to the study team leadership. The members of the committee are independent of the University of Washington, Fred Hutchinson Cancer Research Center, Genentech, a member of the Roche Group, and clinical investigators participating in this trial, and will not have any other involvement in the study, nor will they have any relation to study subjects.

Prior to beginning patient accrual, the DSMB will review the research protocol and identify any potential problems with randomization and implementation of the protocol. At this early phase, the DSMB will also review plans for data and safety monitoring to ensure that the frequency of monitoring is appropriate for the ganciclovir intervention.

During patient accrual, all serious adverse events will be reported to the chairperson of the DSMB. The DSMB may recommend any steps to ensure the safety of study subjects and the integrity of the trial.

The DSMB will be involved with the planned interim analysis. The interim monitoring guidelines that the DSMB will follow will be described in the Statistical Analysis Plan. The DSMB minutes will summarize the actions and deliberations of the DSMB and will be made available at the conclusion of the trial. At the time of interim analyses, the DSMB will aid in identifying problems surrounding patient accrual and randomization, data collection, and follow-up. At this time the DSMB will evaluate safety through a comparison of adverse events across study arms.

The DSMB may recommend that specific groups be withdrawn from the study, if any subgroup manifests serious or widespread side effects, or that the trial be terminated altogether. To guarantee the unrestricted performance of its task, the DSMB may receive the individual study morbidity and mortality data from an unblinded statistician.

#### 1.5 Protection against Risks

Study procedures (blood draw, throat swab, ETT) will be conducted in a clinical setting by medical staff trained to perform the various procedures. Medical attention will be promptly provided to patients who experience adverse events resulting from study procedures.

Safety labs will be monitored regularly for any adverse reactions to study drug. In order to address the black box warning for ganciclovir, we have included an extended follow-up period of six months.

#### 1.6 Protecting Confidentiality

Specimens will be coded with unique study identification numbers in order to protect patient confidentiality. No identifying information of any kind may be released to persons or agencies without specific written permission. At the coordinating center, multiple mechanisms have been established to protect the confidentiality of specimens, medical records and data used in this project. All personnel who work on this study have signed or will sign a pledge of confidentiality. Access to the database is controlled through secure password protection, and passwords must be changed at quarterly intervals. Access to the work site is controlled through passkeys and ID badges. Individuals who are not employees must be escorted at all times by an employee. Study sites will employ site-specific confidentiality measures, including electronic and physical barriers.

#### 1.7 Adverse Events and Unanticipated Problems

Please refer to Section 11.0 Adverse Event Reporting.

---

**APPENDIX G: SEVERE SEPSIS CRITERIA**

2057

2058

2059 **Sepsis is defined as a documented or suspected infection together with at least 2 of the following 4 clinical**  
2060 **findings present:**

2061

2062

- Temperature greater than 38°C (100.4°F) or less than 36°C (96.8°F)

2063

- Heart rate (HR) greater than 90 beats per minute (bpm)

2064

2065

- Respiratory rate (RR) greater than 20 breaths per minute or arterial carbon dioxide tension (PaCO<sub>2</sub>) lower than 32 mm Hg

2066

2067

- White blood cell (WBC) count higher than 12,000/μL or lower than 4000/μL, or 10% immature (band) forms

2068

2069

2070

2071

Infection is defined as a documented or a suspected infection. Suspected infection is evidenced by one or more of the following: white cells in a normally sterile body fluid; perforated viscus; radiographic evidence of pneumonia in association with the production of purulent sputum; a syndrome associated with a high risk of infection (e.g., ascending cholangitis) and empiric antibiotic treatment.

2072

2073

2074

2075

2076

**Severe sepsis is defined as sepsis (above) associated with organ dysfunction, hypoperfusion or hypotension.**

**Organ dysfunction variables:**

2077

Arterial hypoxemia (PaO<sub>2</sub>/FIO<sub>2</sub> <300) if PaO<sub>2</sub> is not available then use (SpO<sub>2</sub>/PaO<sub>2</sub><315)

2078

Acute oliguria (urine output <0.5 mL·kg<sup>-1</sup>·hr<sup>-1</sup> or 45 mmol/L for at least 2 hrs)

2079

Creatinine > 2.0 mg/dL in patient without pre-existing renal failure

2080

Coagulation abnormalities (INR >1.5 or a PTT >60 secs)

2081

Thrombocytopenia (platelet count <100,000 μL<sup>-1</sup>)

2082

Hyperbilirubinemia (plasma total bilirubin > 2.0 mg/dL or 35 mmol/L)

2083

2084

**Tissue perfusion variables:**

2085

Hyperlactatemia (>2 mmol/L)

2086

2087

**Hemodynamic variables:**

2088

Arterial hypotension (SBP <90 mm Hg, MAP <70, or SBP decrease >40 mm Hg)

2089

The use of vasopressor medications in an attempt to maintain SBP>90 or MAP>70.

2090

---

**HTTP://WWW.SCCM.ORG/DOCUMENTS/SSC-GUIDELINES.PDF APPENDIX H: GANCICLOVER  
PACKAGE INSERT**

2091  
2092  
2093  
2094  
2095  
2096  
2097  
2098  
2099  
2100  
2101  
2102  
2103  
2104  
2105  
2106  
2107  
2108  
2109  
2110  
2111  
2112  
2113  
2114  
2115  
2116  
2117  
2118  
2119  
2120  
2121  
2122  
2123  
2124  
2125  
2126  
2127  
2128  
2129  
2130  
2131  
2132  
2133  
2134  
2135  
2136  
2137  
2138  
2139  
2140  
2141  
2142  
2143  
2144  
2145  
2146

<http://www.gene.com/gene/products/information/cytovene/pdf/pi.pdf>

**APPENDIX I: VALGANCICLOVIR PACKAGE INSERT**

2147  
2148  
2149  
2150  
2151  
2152  
2153  
2154

<http://www.gene.com/gene/products/information/valcyte/pdf/pi.pdf>
